# Supplementary material for: Methyl-Thiol-Bridged Oxadiazole and Triazole Heterocycles as Inhibitors of NF-κB in Chronic Myelogenous Leukemia Cells
Source: MDPI journal article supplement (doi:10.3390/biomedicines11061662), 2023-06-08
Supplement: s1 [file s1]

# **Methyl-thiol-bridged oxadiazole and triazole heterocycles as inhibitors of NF- $\kappa$ B in chronic myelogenous leukemia cells**

**Basappa Basappa, Young Yun Jung, Akshay Ravish, Zhang Xi, Ananda Swamynayaka, Mahendra Madegowda, Vijay Pandey, Peter E. Lobie, Gautam Sethi, Kwang Seok Ahn and**

**Supplementary Data**

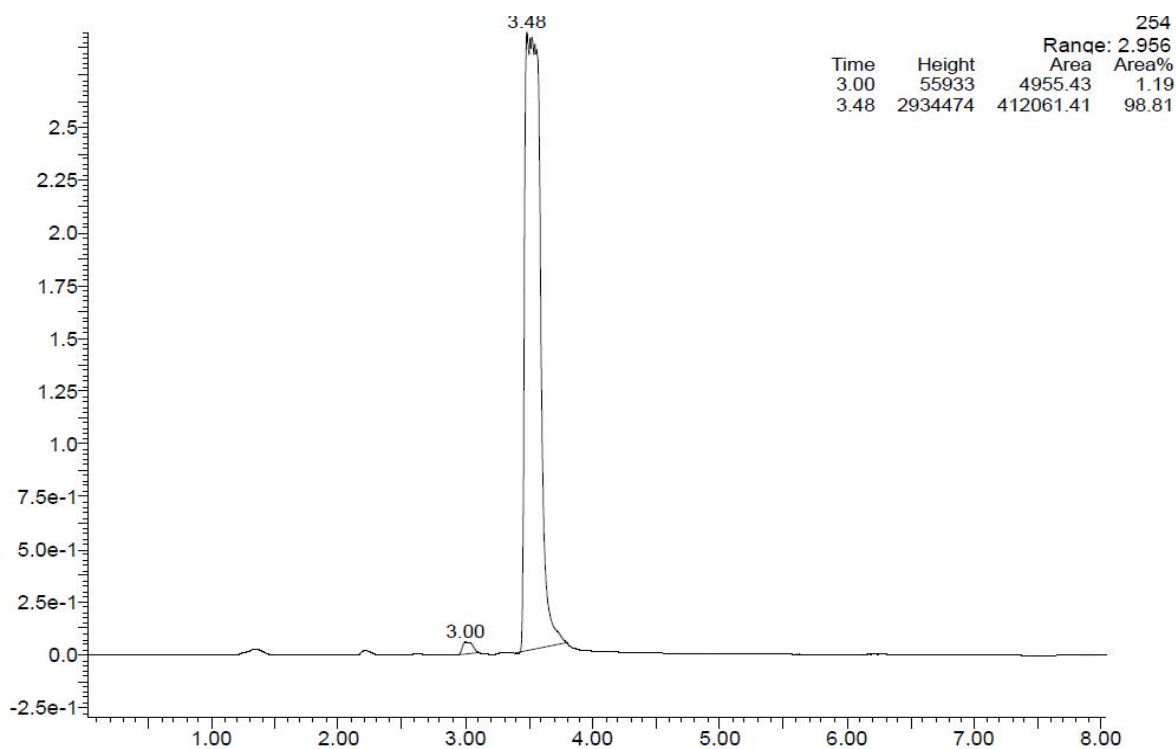

Liquid chromatogram of 2

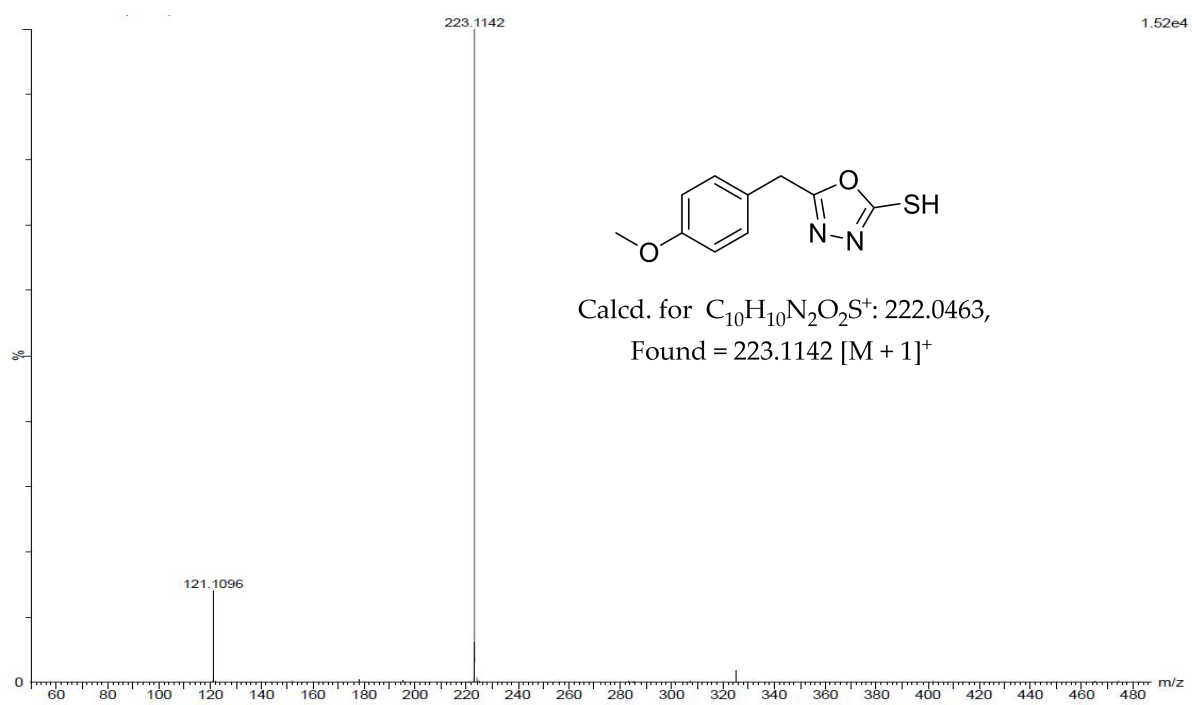

Mass spectra of 2

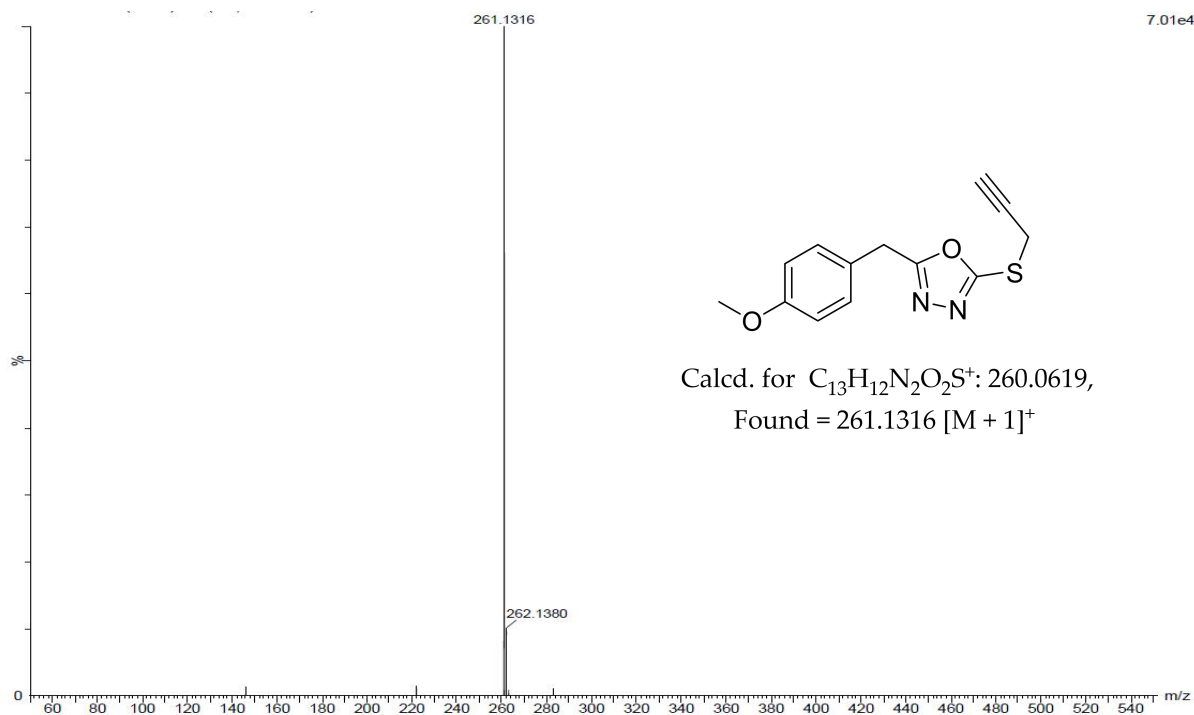

Mass spectra of 3

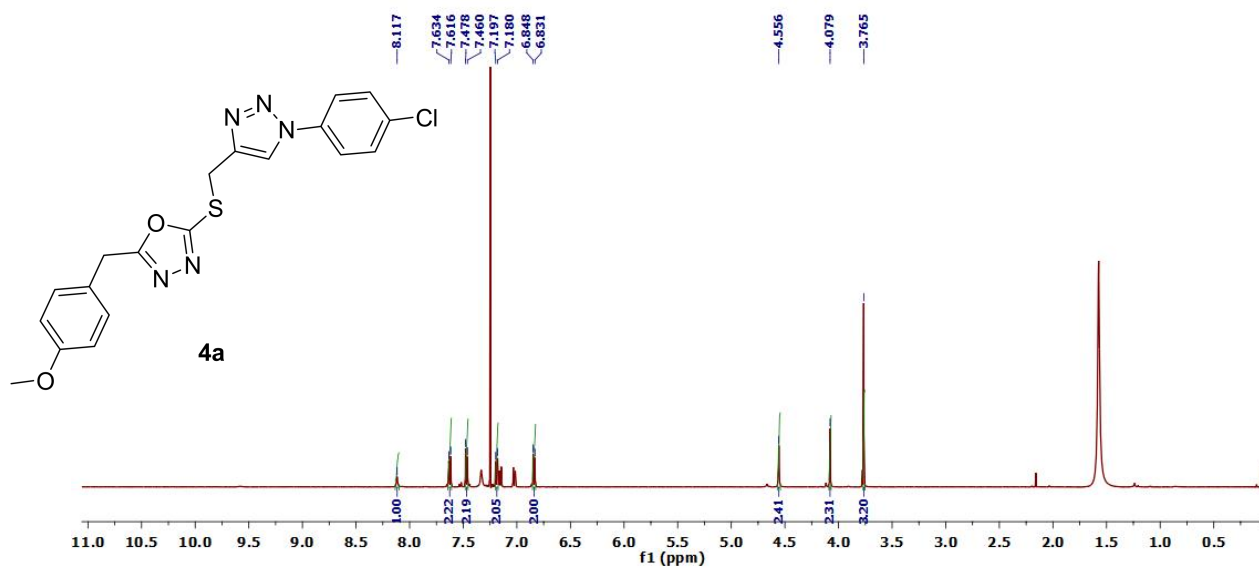

$^1H$  NMR of 4a

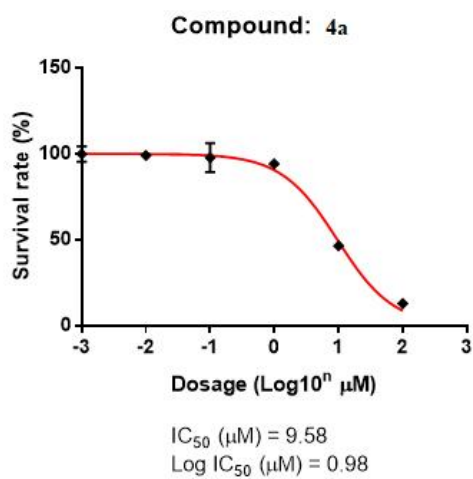

- Cell line: MCF7 (2000 cells/per well<sup>96</sup>)
- Treated time: 72hrs
- Assay: alamarBlue (4hrs incubated)
- Data: 4a

| Conc. ( $\mu\text{M}$ ) | Viability |           |
|-------------------------|-----------|-----------|
|                         | AVE.      | $\pm$ SD. |
| 0                       | 100.00    | 4.56      |
| 0.01                    | 99.04     | 2.24      |
| 0.1                     | 97.79     | 8.53      |
| 1                       | 94.16     | 2.86      |
| 10                      | 46.46     | 2.84      |
| 100                     | 12.78     | 0.19      |

Cytotoxicity assay of **4a**

- Cell line: MCF10A(2000cells/per well|96-well plate)
- Treated time: 72hrs
- Assay: alamarBlue(4hrs incubated) N=3

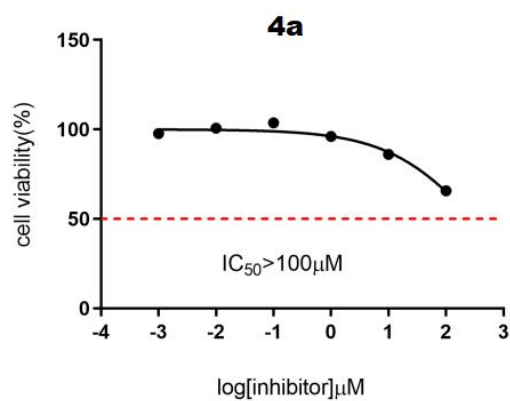

| Conc.( $\mu$ M) | Viability |          |
|-----------------|-----------|----------|
|                 | AVE.      | $\pm$ SD |
| 0               | 100.00    | 2.52     |
| 0.01            | 100.67    | 1.15     |
| 0.1             | 103.67    | 1.53     |
| 1               | 96.00     | 1.00     |
| 10              | 86.00     | 2.65     |
| 100             | 65.67     | 1.53     |

Cytotoxicity assay for the compound **4a**

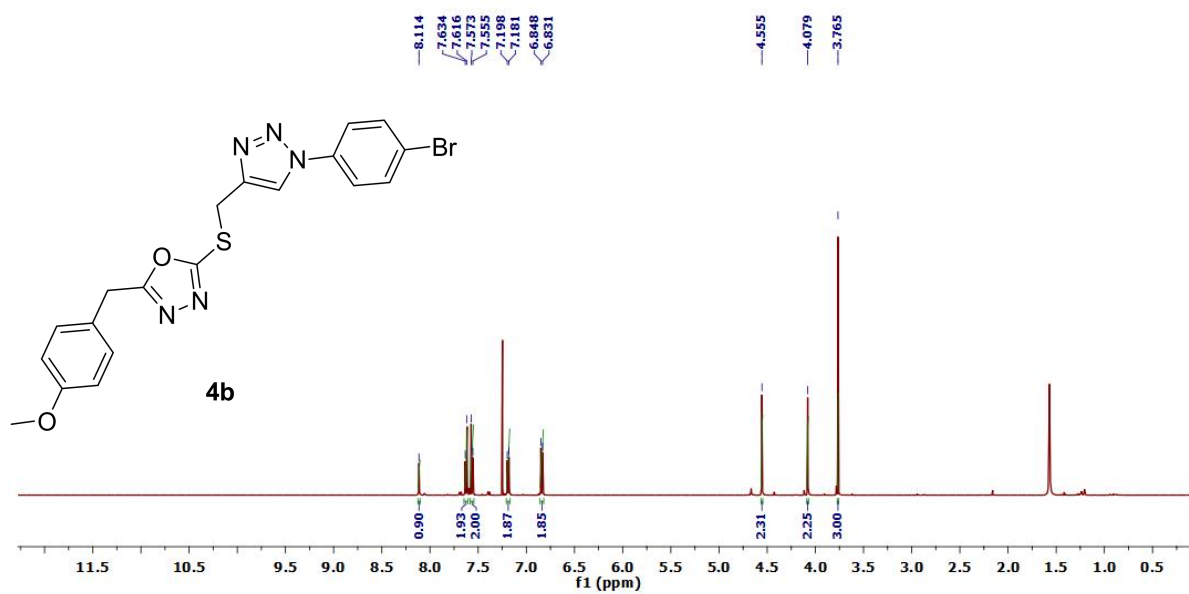

$^1H$  NMR of **4b**

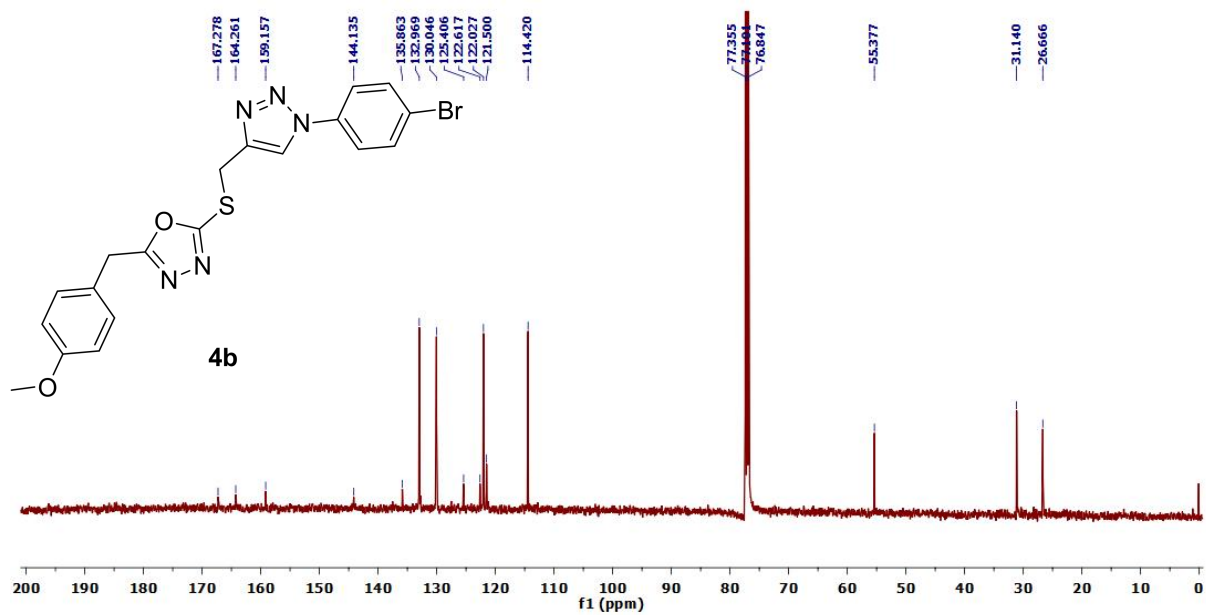

<sup>13</sup>C NMR of **4b**

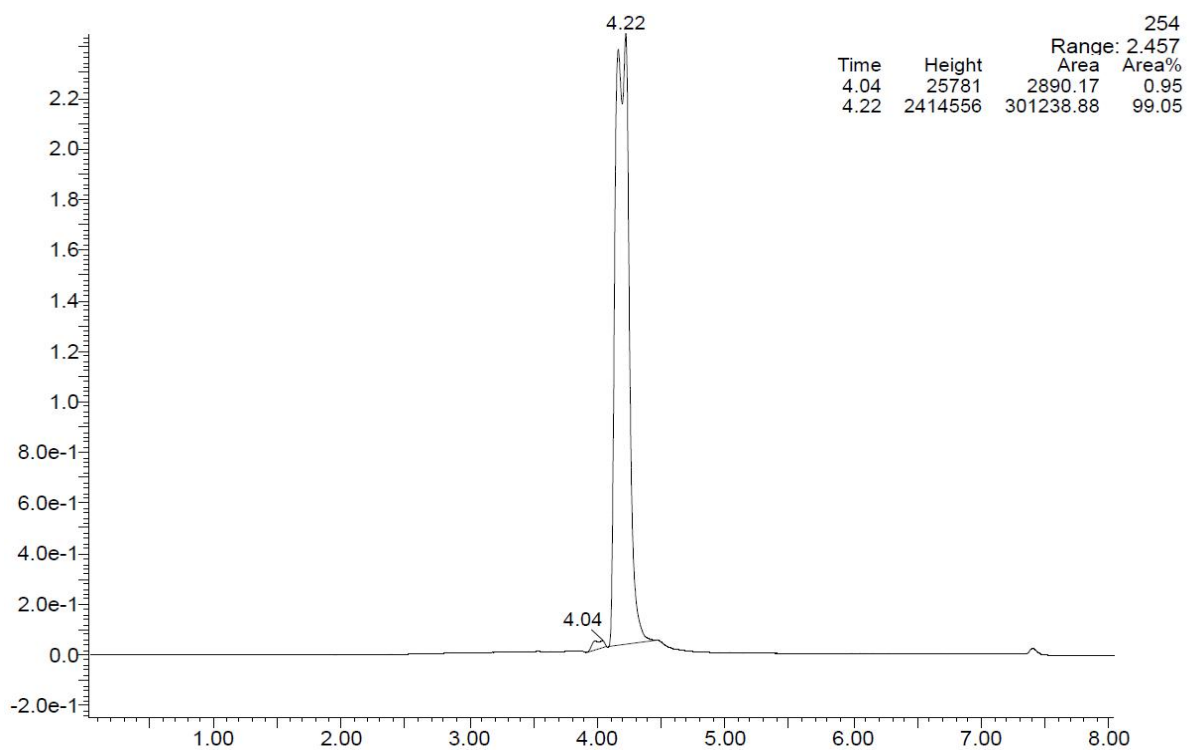

Liquid chromatogram of **4b**

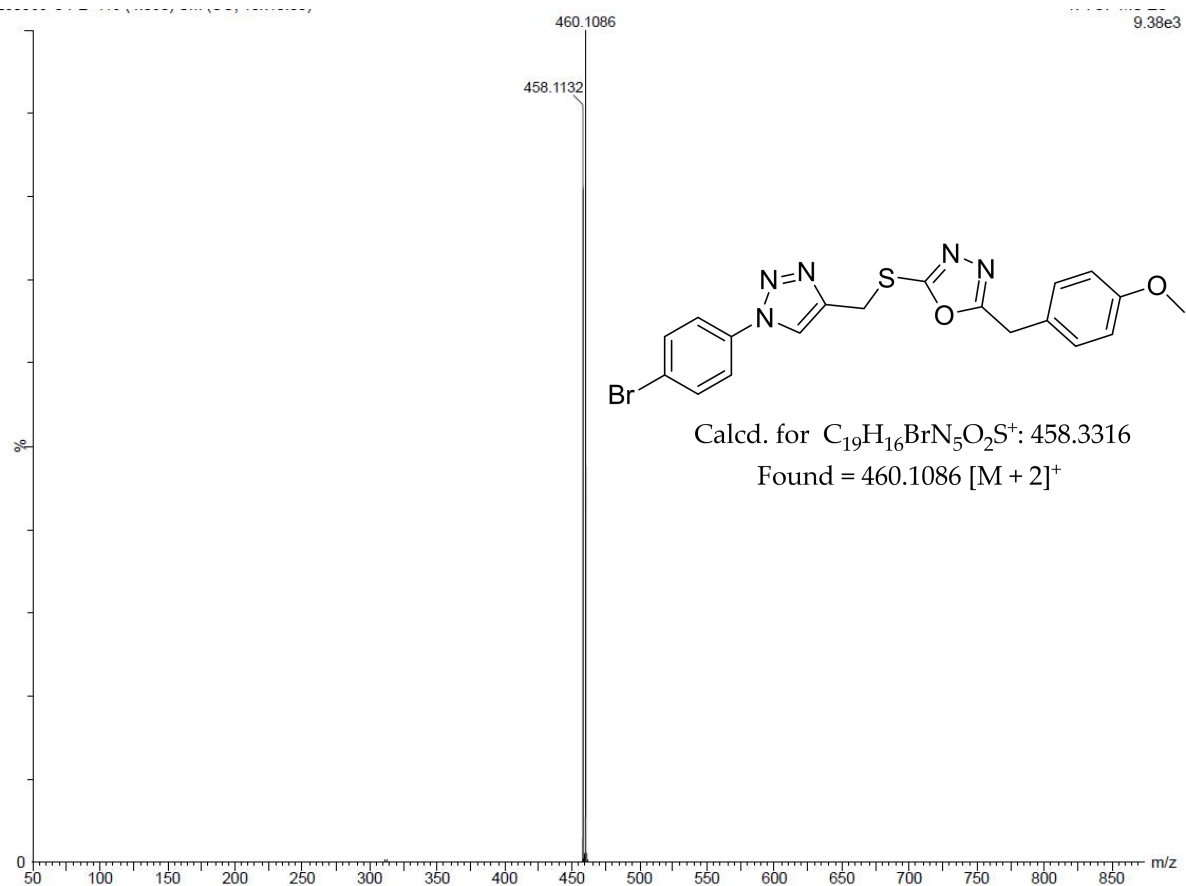

Mass spectra of **4b**

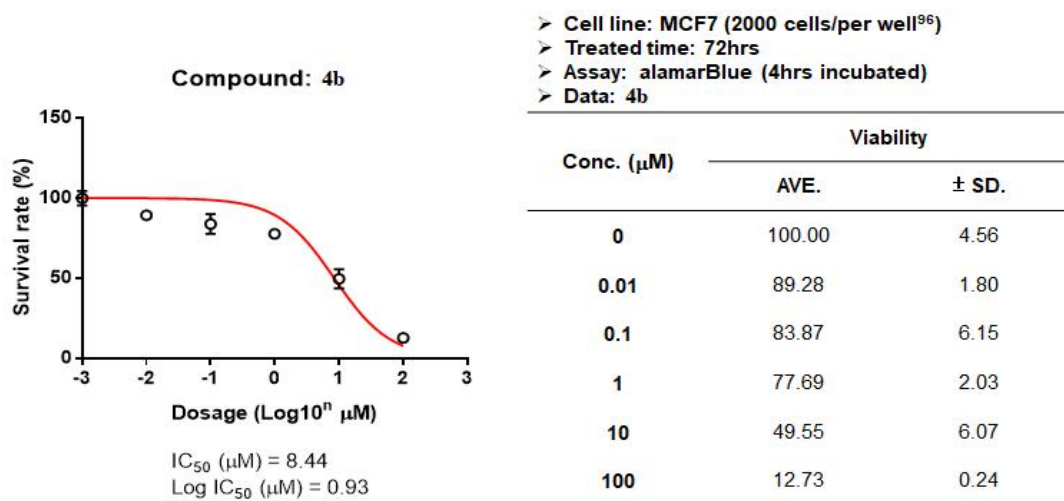

Cytotoxicity assay of **4b**

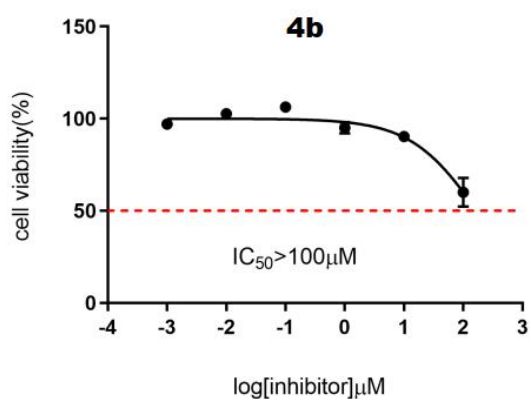

| Conc.(μM) | Viability |      |
|-----------|-----------|------|
|           | AVE.      | ±SD  |
| 0         | 100.00    | 1.73 |
| 0.01      | 102.67    | 1.15 |
| 0.1       | 106.33    | 2.31 |
| 1         | 95.00     | 3.00 |
| 10        | 90.33     | 0.58 |
| 100       | 60.00     | 7.81 |

Cytotoxicity assay for the compound **4b** (MCF-10A)

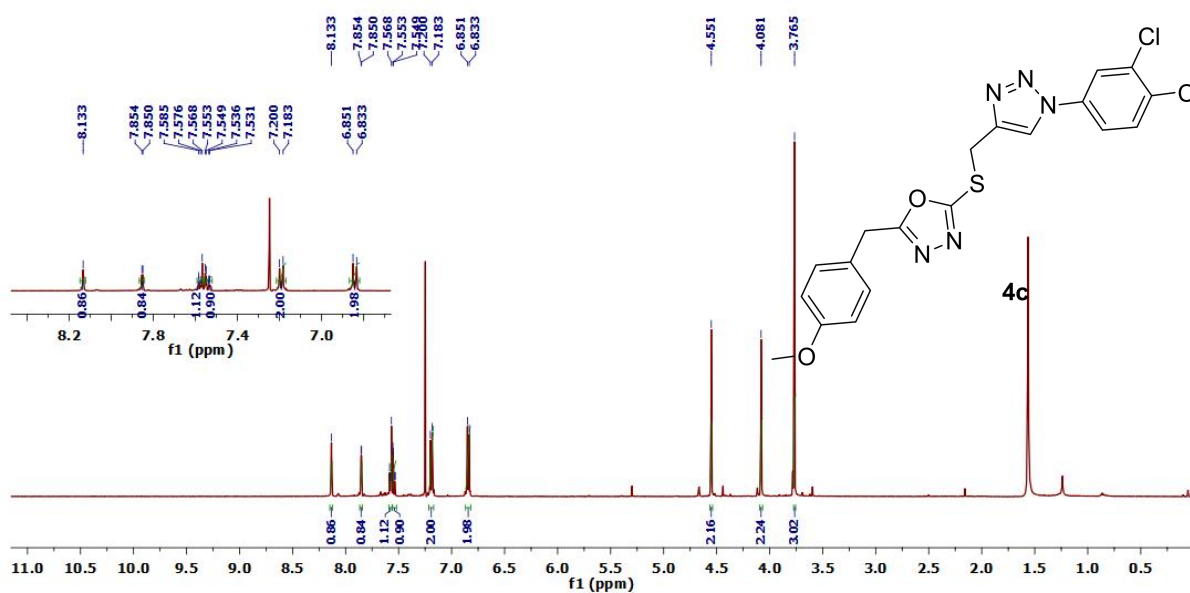

<sup>1</sup>H NMR of **4c**

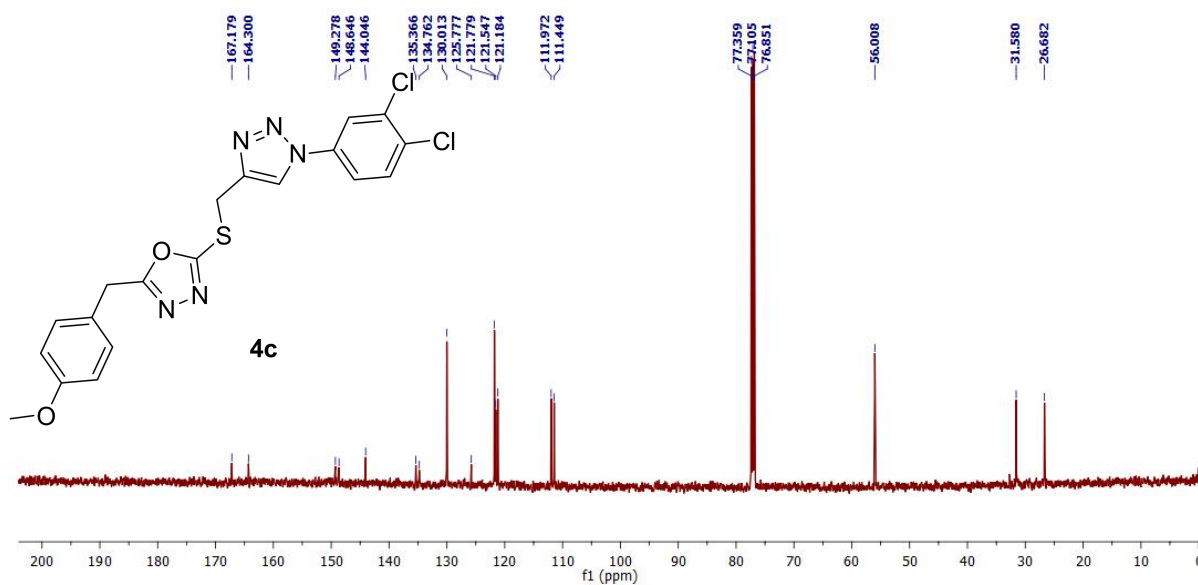



<sup>13</sup>C NMR of **4c**

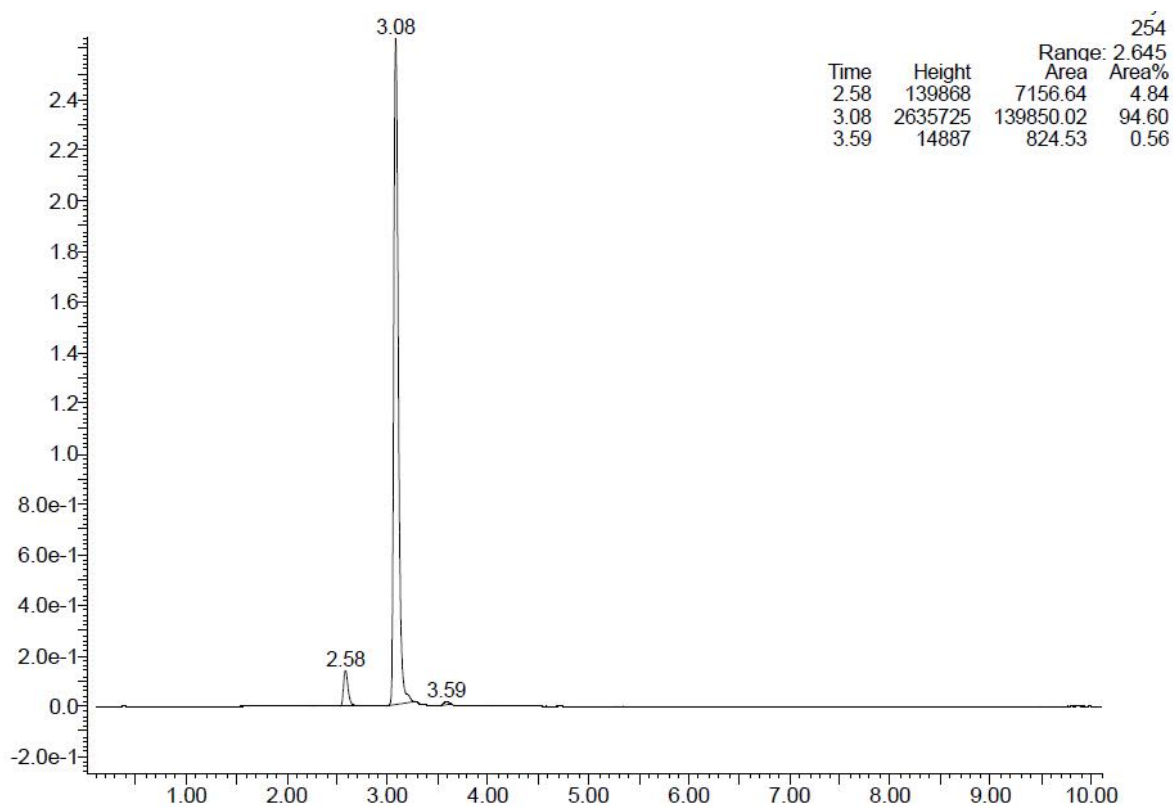

Liquid chromatogram of **4c**

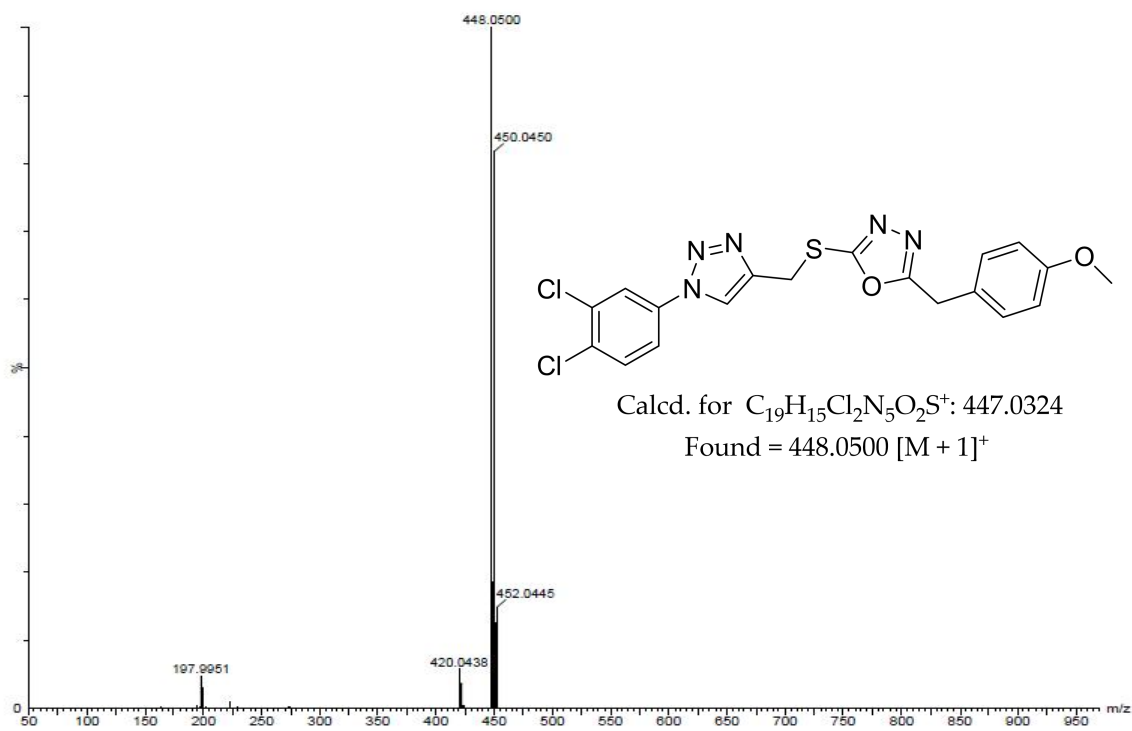

Mass spectra of **4c**

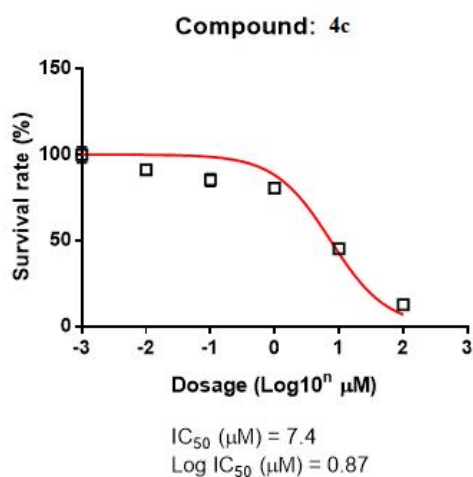

- Cell line: MCF7 (2000 cells/per well<sup>96</sup>)
- Treated time: 72hrs
- Assay: alamarBlue (4hrs incubated)
- Data: 4c

| Conc. ( $\mu\text{M}$ ) | Viability |           |
|-------------------------|-----------|-----------|
|                         | AVE.      | $\pm$ SD. |
| 0                       | 100.00    | 4.56      |
| 0.01                    | 91.20     | 2.49      |
| 0.1                     | 85.17     | 3.49      |
| 1                       | 80.40     | 2.80      |
| 10                      | 45.19     | 1.37      |
| 100                     | 12.54     | 0.18      |

#### Cytotoxicity assay of 4c

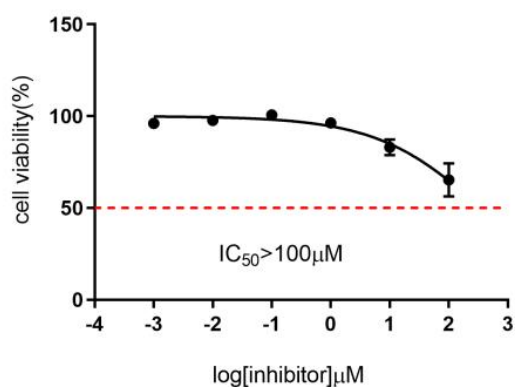

| Conc.( $\mu\text{M}$ ) | Viability |          |
|------------------------|-----------|----------|
|                        | AVE.      | $\pm$ SD |
| 0                      | 100.00    | 1.73     |
| 0.01                   | 97.67     | 2.52     |
| 0.1                    | 100.67    | 2.52     |
| 1                      | 96.33     | 1.53     |
| 10                     | 83.00     | 4.36     |
| 100                    | 65.33     | 9.02     |

#### Cytotoxicity assay for the compound 4c (MCF-10A)

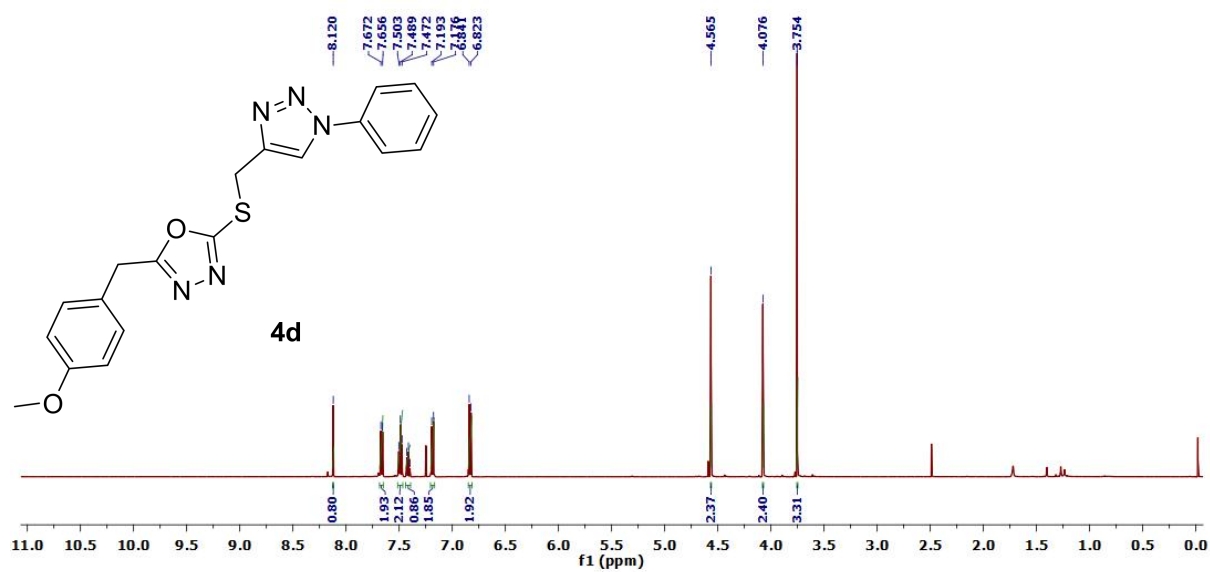

<sup>1</sup>H NMR of **4d**

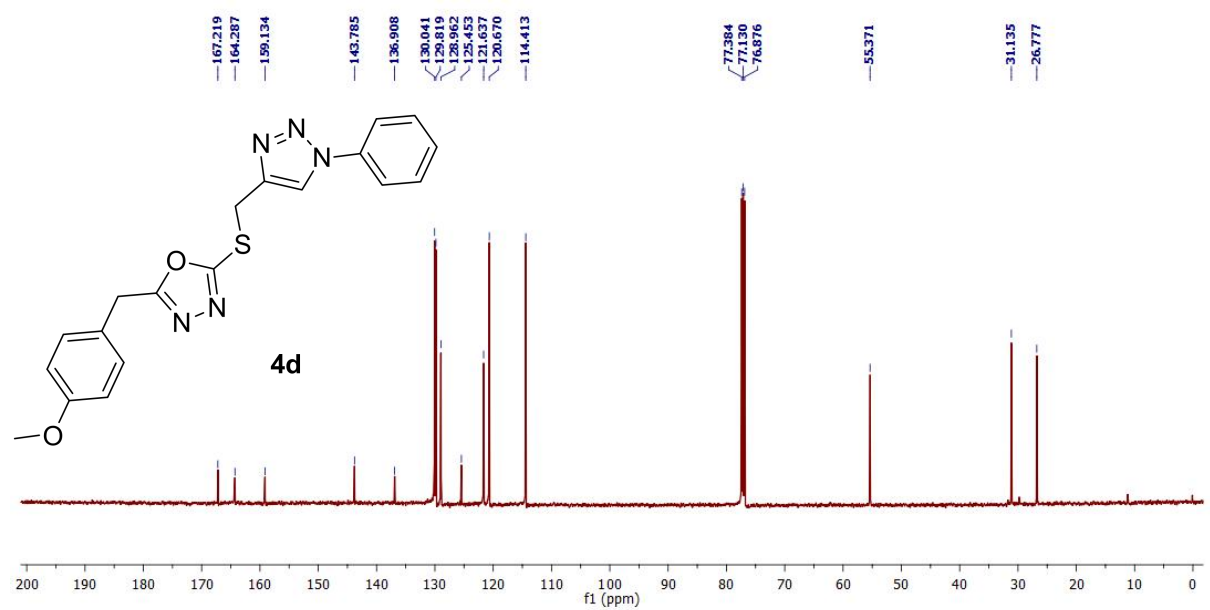

<sup>13</sup>C NMR of **4d**

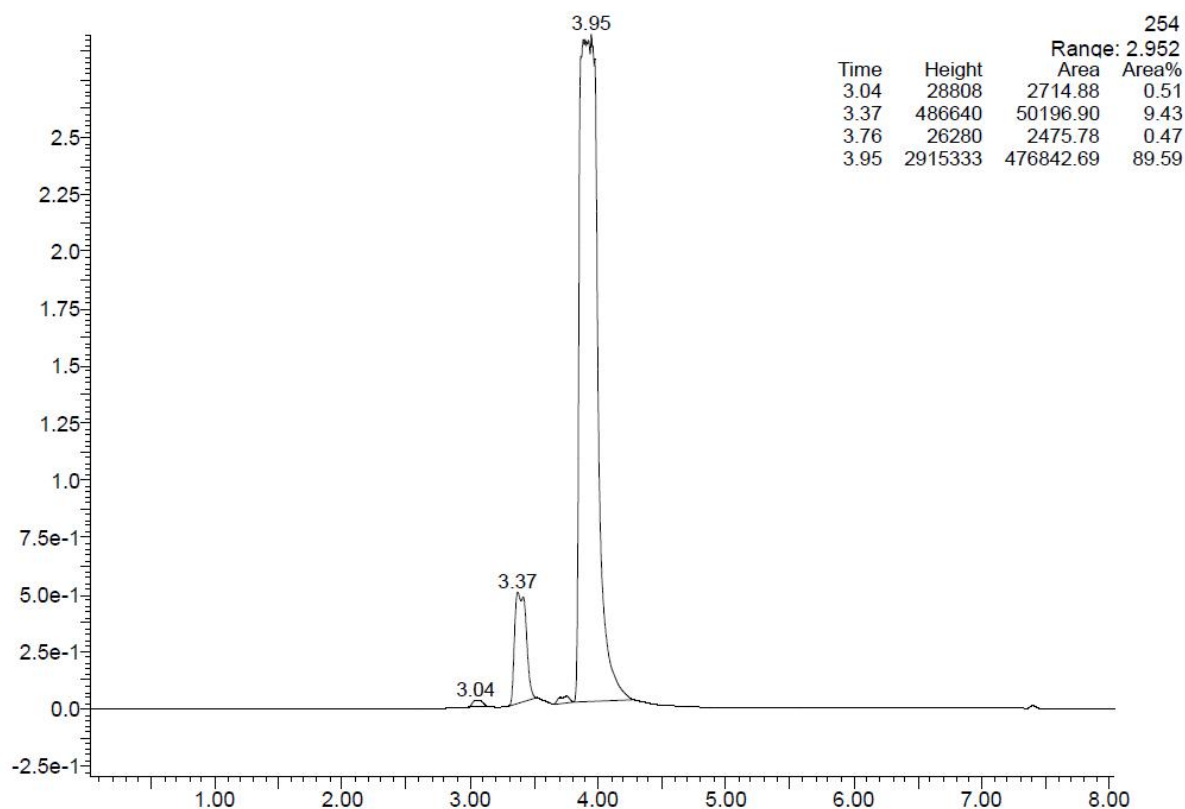

Liquid chromatogram of **4d**

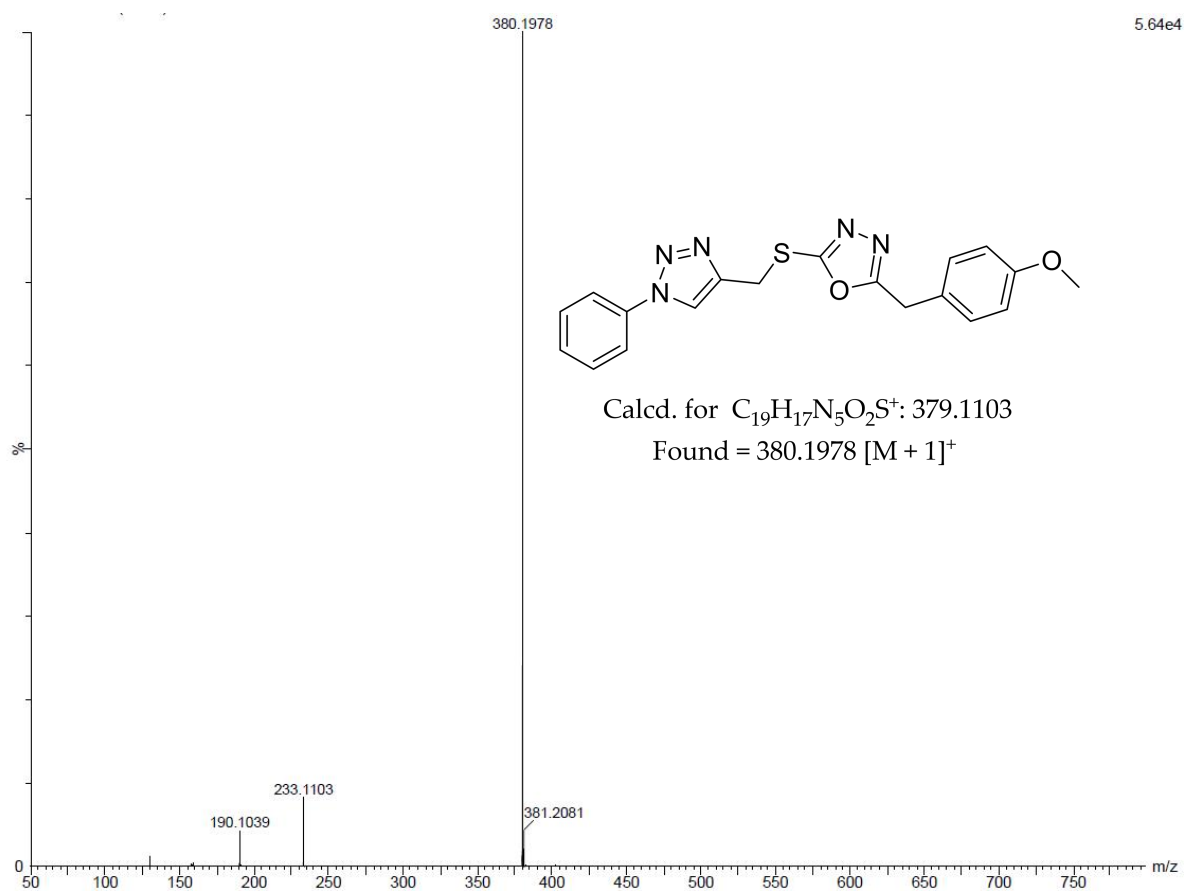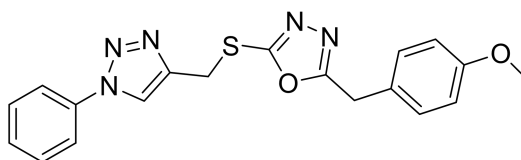

## Mass spectra of 4d

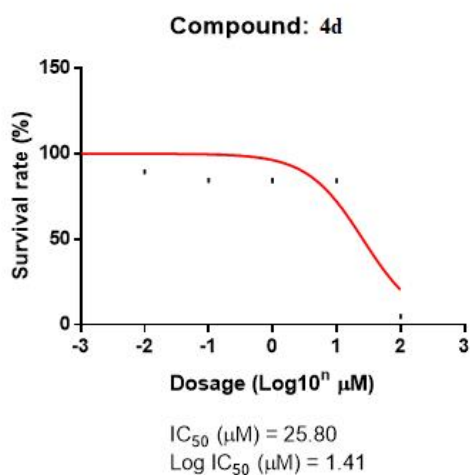

- Cell line: MCF7 (2000 cells/per well<sup>96</sup>)
- Treated time: 72hrs
- Assay: alamarBlue (4hrs incubated)
- Data: 4d

| Conc. ( $\mu\text{M}$ ) | Viability |           |
|-------------------------|-----------|-----------|
|                         | AVE.      | $\pm$ SD. |
| 0                       | 100.00    | 1.75      |
| 0.01                    | 90.90     | 1.08      |
| 0.1                     | 85.88     | 2.97      |
| 1                       | 85.87     | 1.98      |
| 10                      | 85.74     | 2.98      |
| 100                     | 6.28      | 0.02      |

## Cytotoxicity assay of 4d

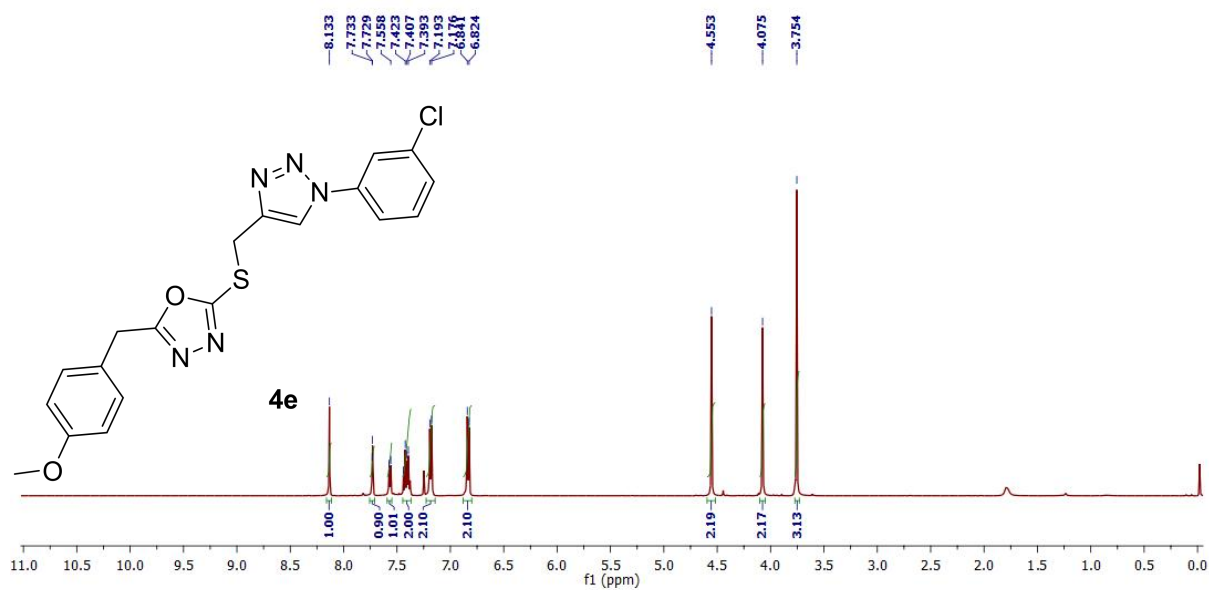

## $^1\text{H}$ NMR of 4e

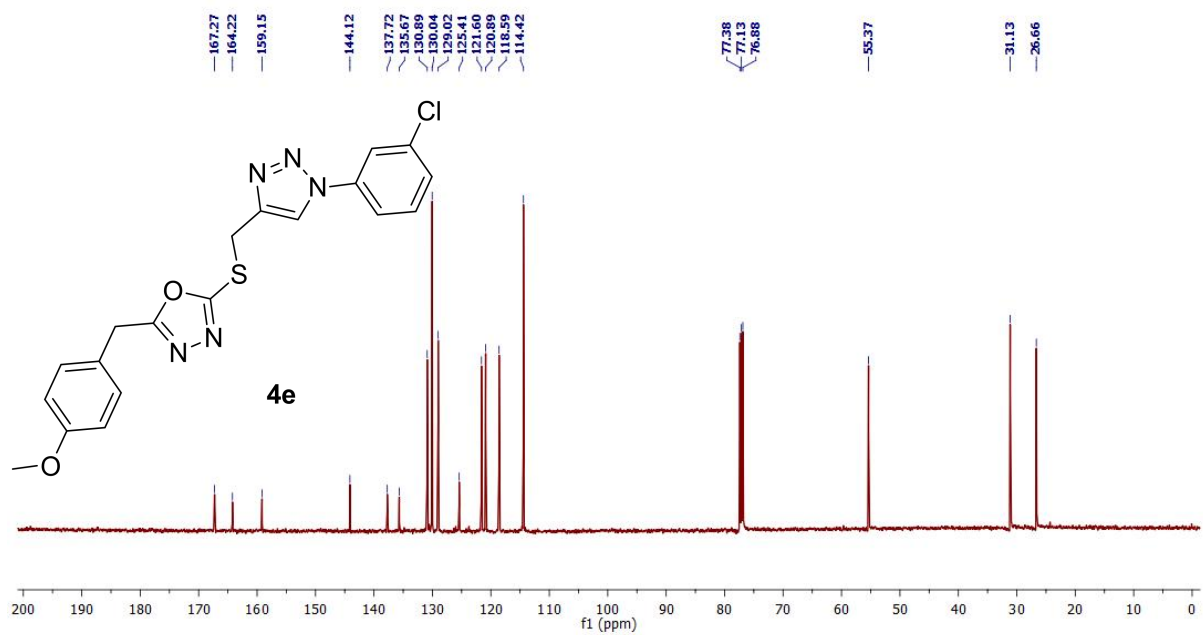

<sup>13</sup>C NMR of **4e**

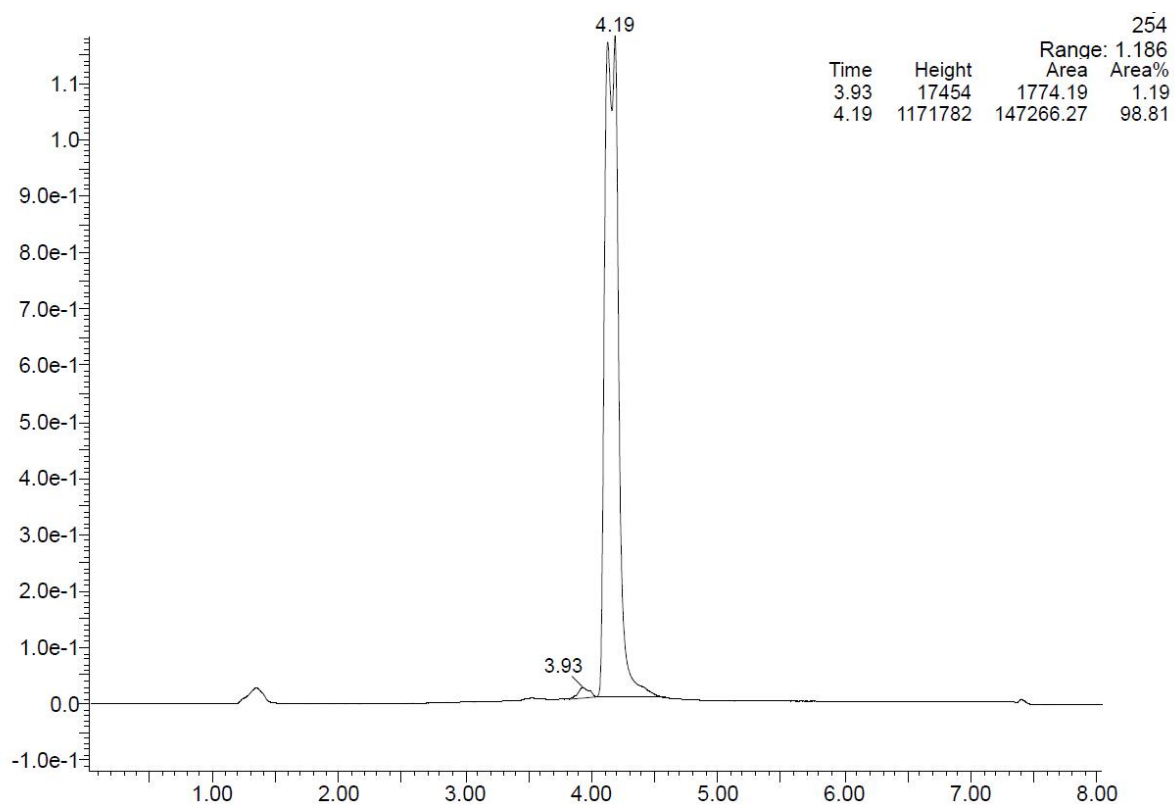

# Liquid chromatogram of 4e

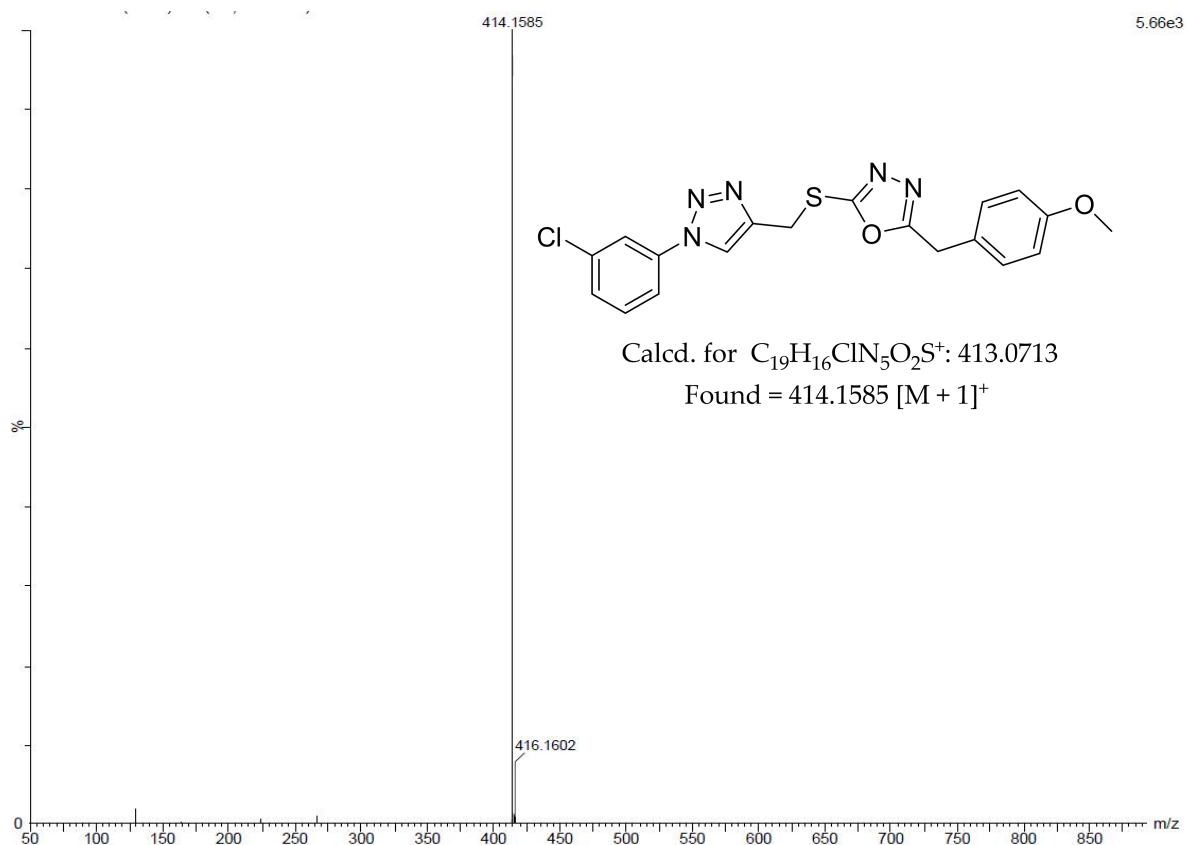

## Mass spectra of 4e

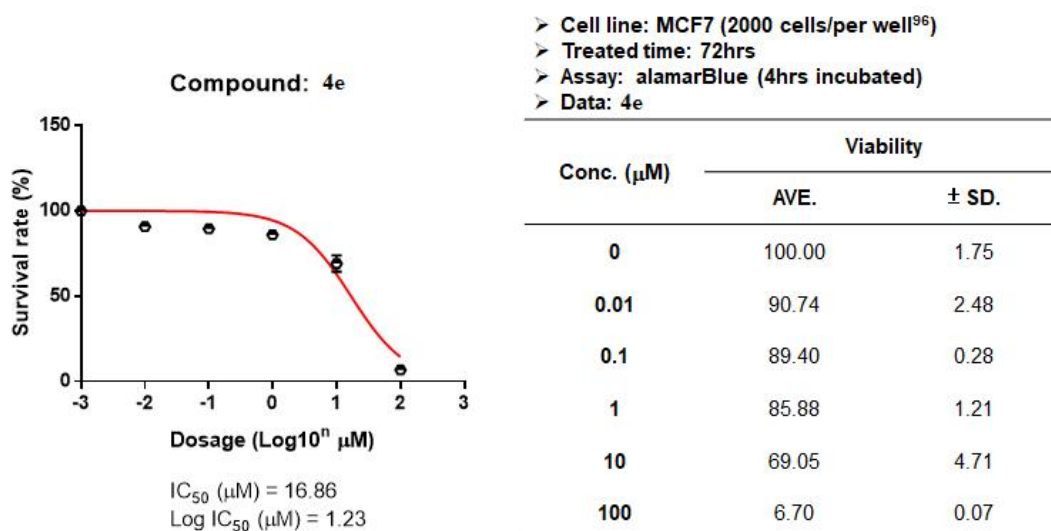

## Cytotoxicity assay of 4e

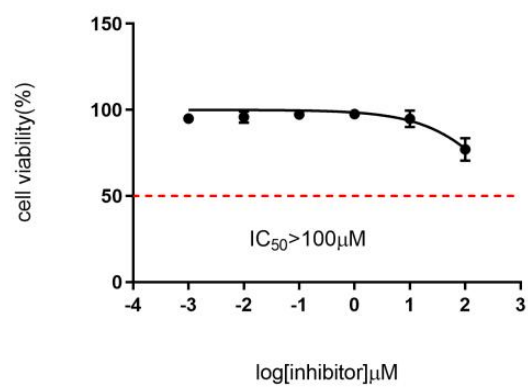

| Conc.( $\mu$ M) | Viability |          |
|-----------------|-----------|----------|
|                 | AVE.      | $\pm$ SD |
| 0               | 100.00    | 2.76     |
| 0.01            | 95.80     | 3.21     |
| 0.1             | 97.33     | 1.15     |
| 1               | 97.50     | 2.29     |
| 10              | 94.87     | 4.86     |
| 100             | 77.10     | 6.59     |

**Cytotoxicity data for the compound 4e**



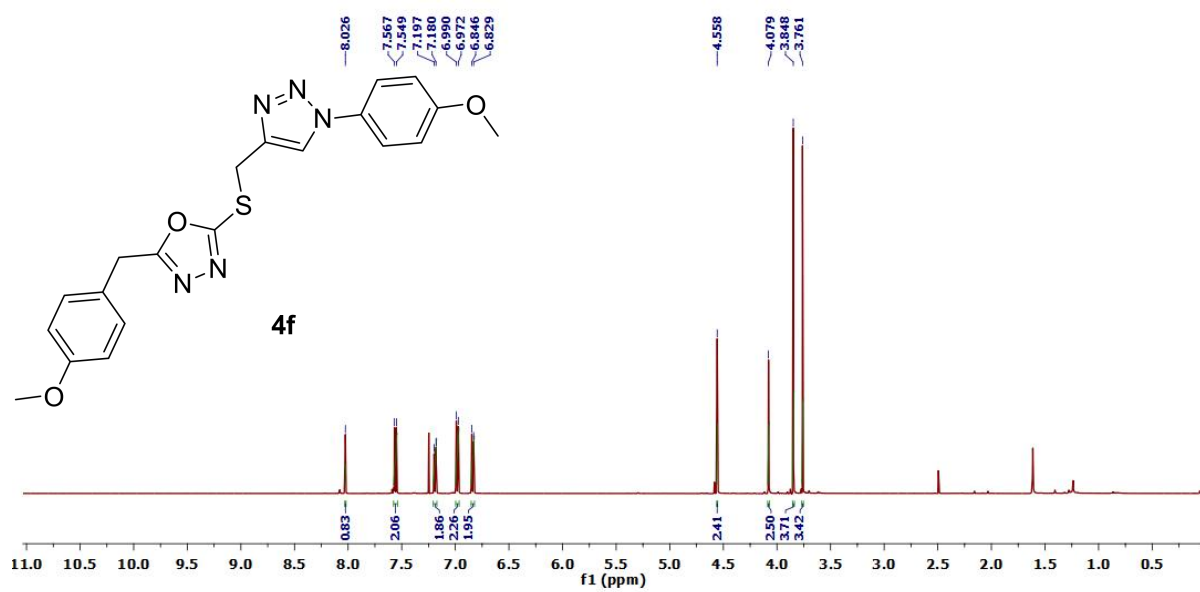

<sup>1</sup>H NMR of 4f

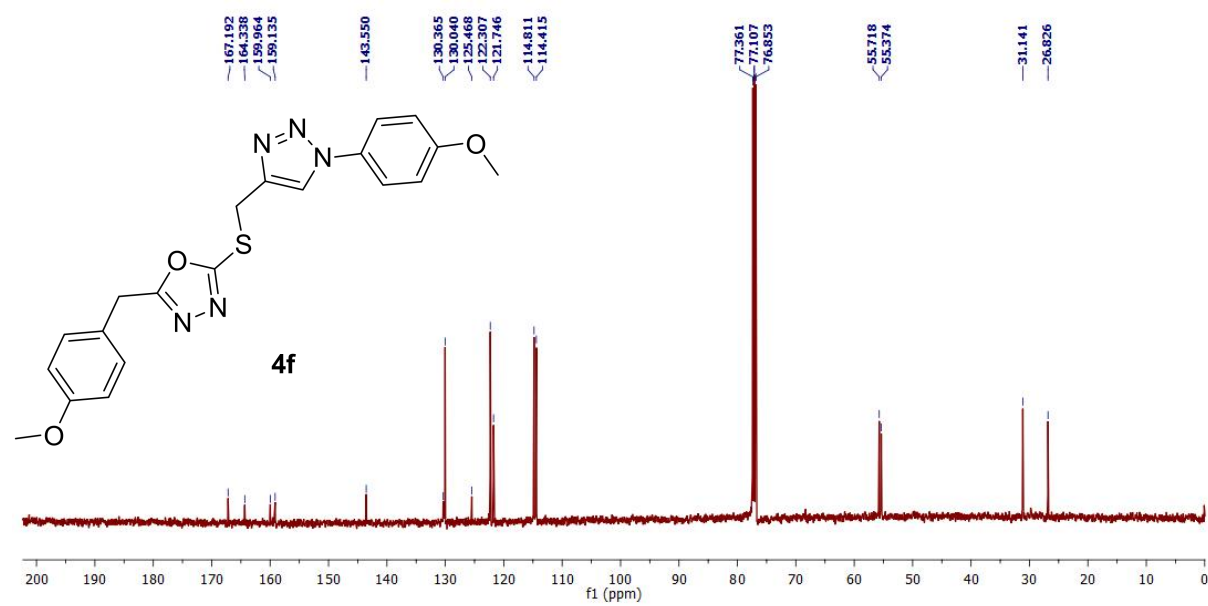

<sup>13</sup>C NMR of 4f

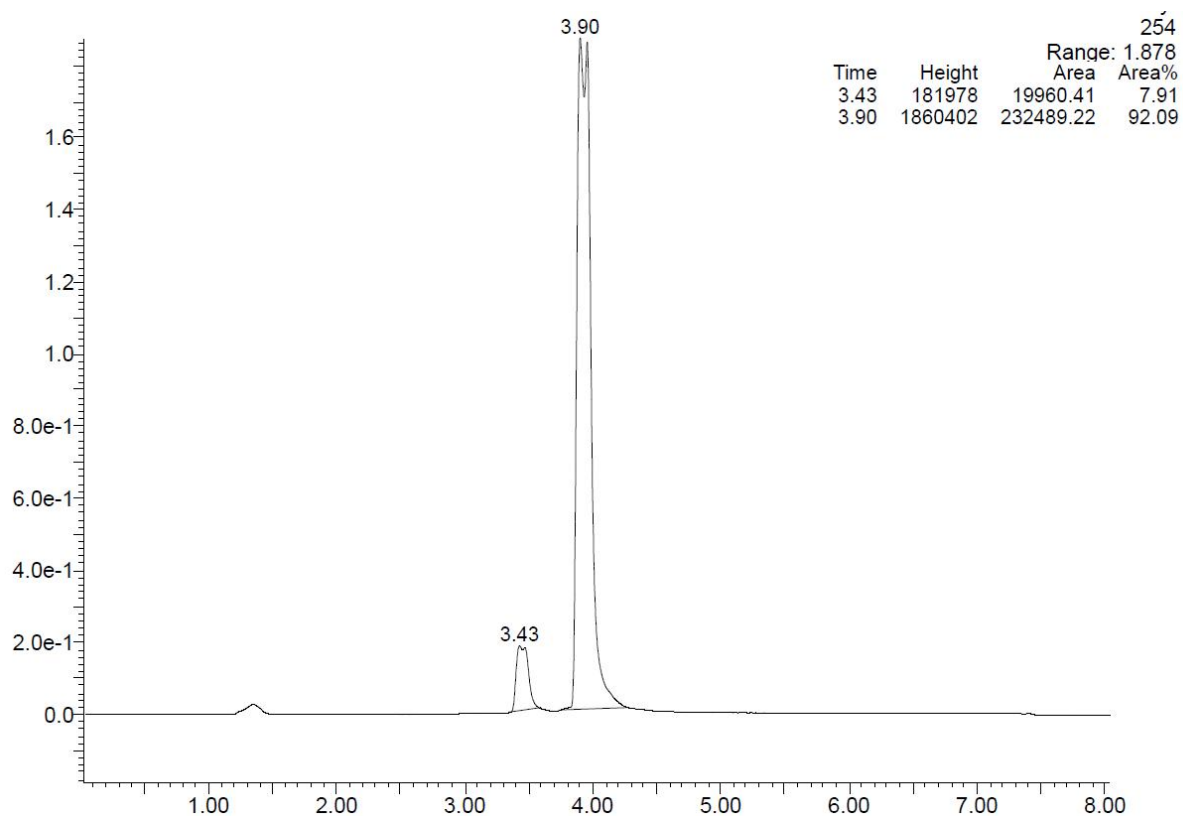

Liquid chromatogram of **4f**

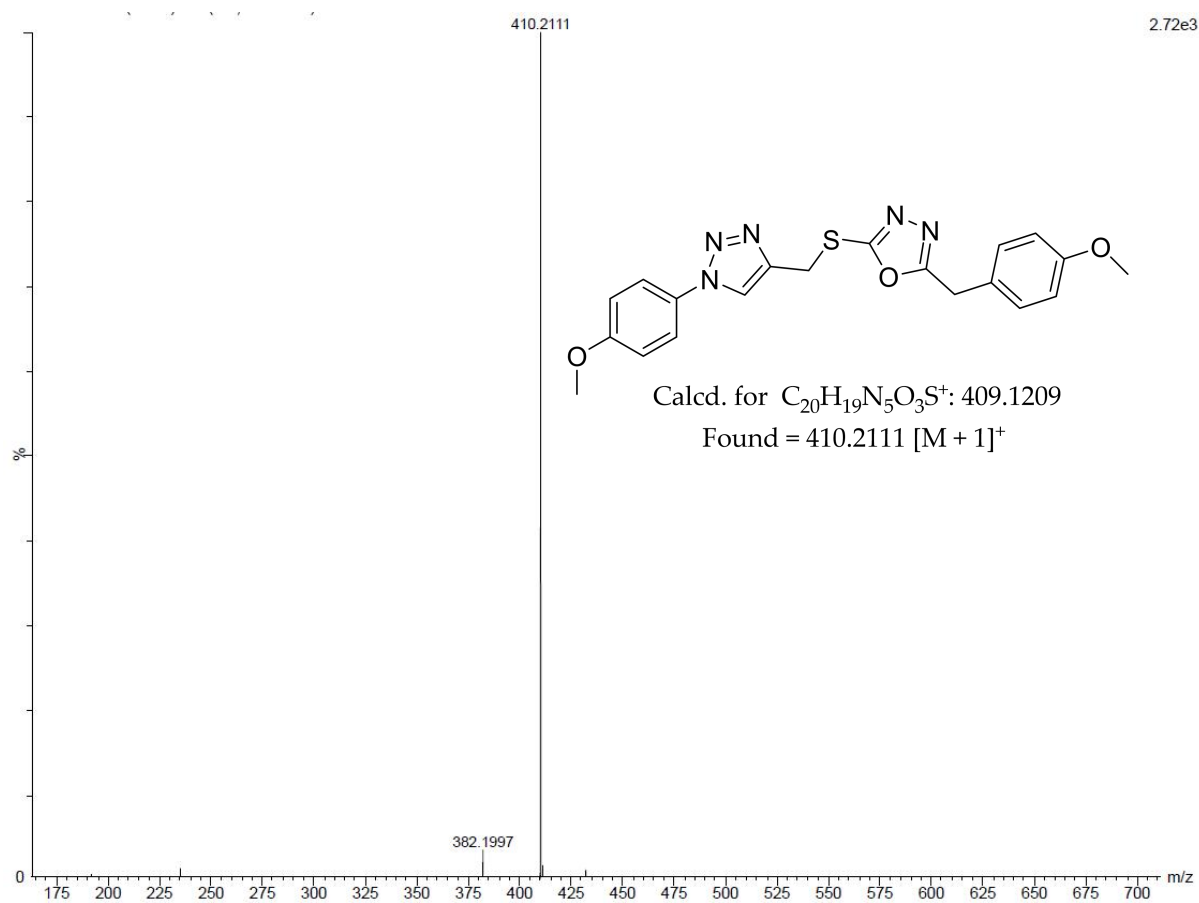

## Mass spectra of 4f

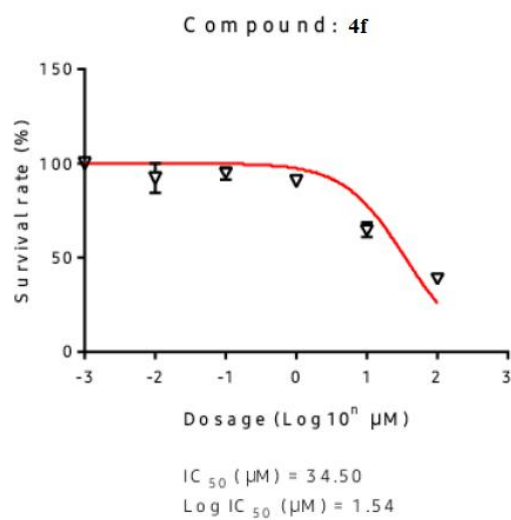

- Cell line: MCF-7 (2000 cells/per well<sup>96</sup>-well plate)
- Treated time: 72hrs
- Assay: alamarBlue (4hrs incubated)
- Data: 4f

| Conc. ( $\mu\text{M}$ ) | Viability |           |
|-------------------------|-----------|-----------|
|                         | AVE.      | $\pm$ SD. |
| 0                       | 100.00    | 2.45      |
| 0.01                    | 91.99     | 7.77      |
| 0.1                     | 94.69     | 3.12      |
| 1                       | 90.48     | 1.89      |
| 10                      | 64.48     | 4.02      |
| 100                     | 38.62     | 2.45      |

## Cytotoxicity assay of 4f

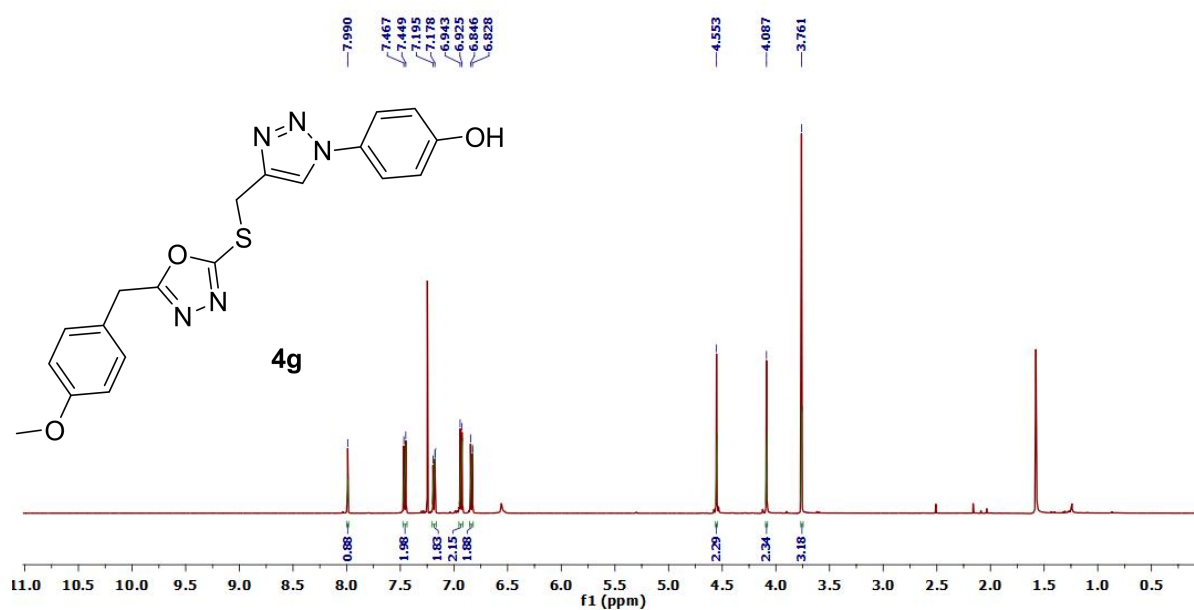

## $^1\text{H}$ NMR of 4g

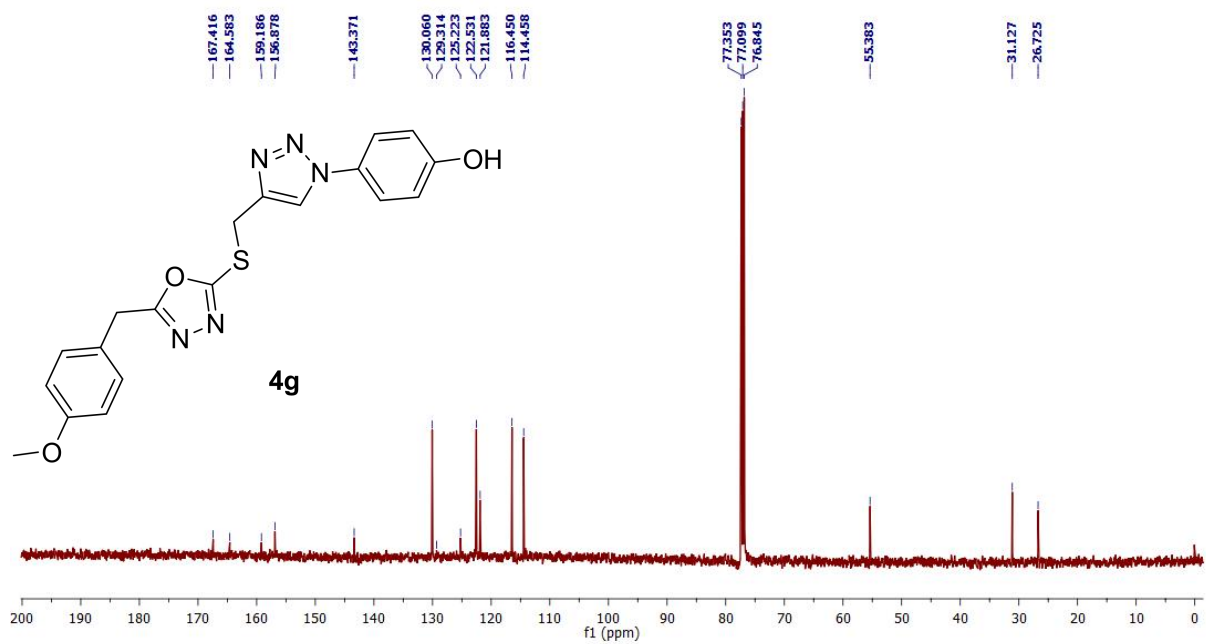

<sup>13</sup>C NMR of **4g**

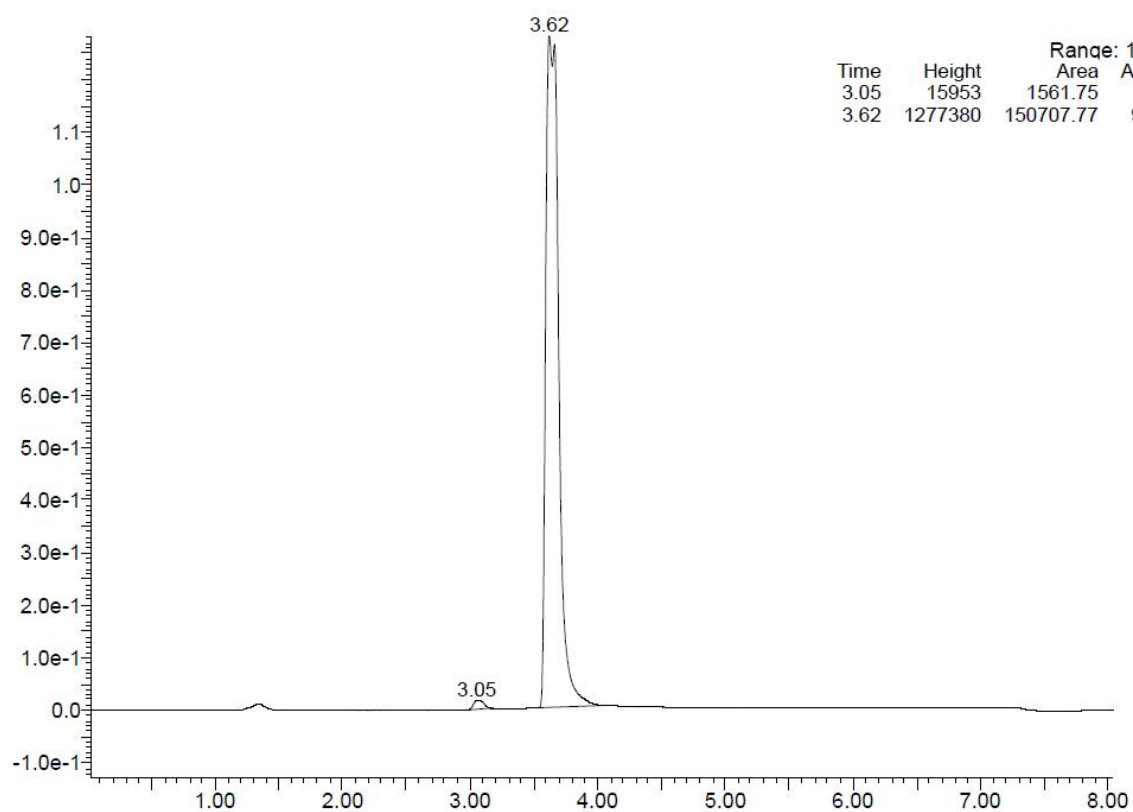

## Liquid chromatogram of 4g

441

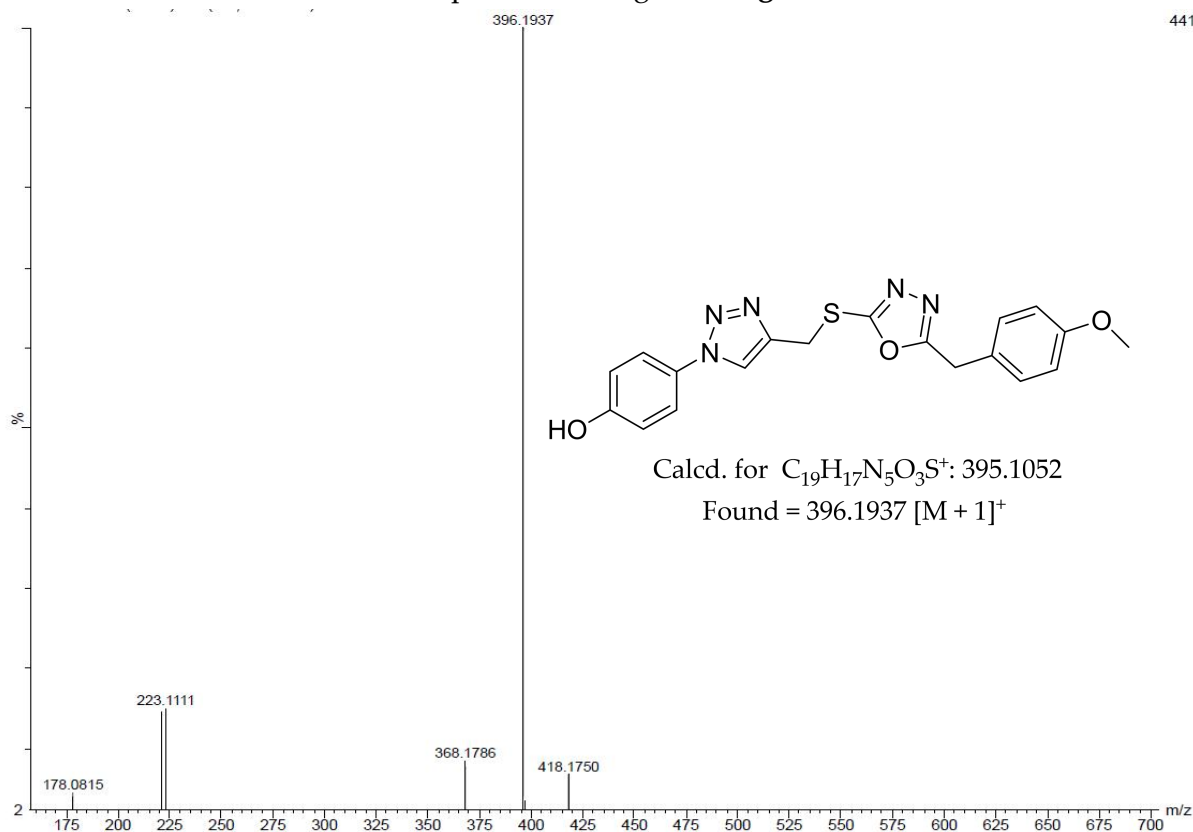

## Mass spectra of 4g

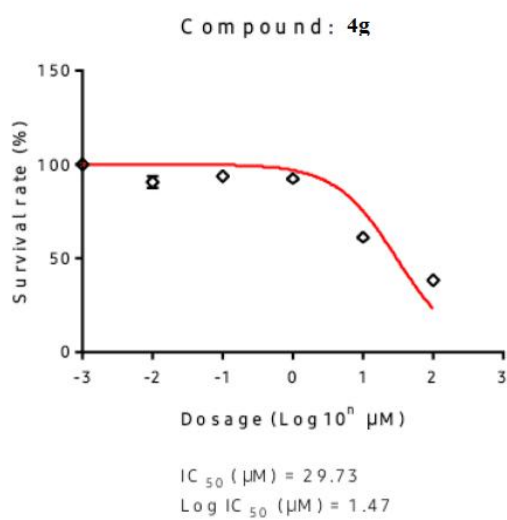

- Cell line: MCF-7 (2000 cells/per well<sup>96</sup>-well plate)
- Treated time: 72hrs
- Assay: alamarBlue (4hrs incubated)
- Data: 4g

| Conc. ( $\mu\text{M}$ ) | Viability |           |
|-------------------------|-----------|-----------|
|                         | AVE.      | $\pm$ SD. |
| 0                       | 100.00    | 2.45      |
| 0.01                    | 90.38     | 3.38      |
| 0.1                     | 93.43     | 0.64      |
| 1                       | 92.40     | 2.29      |
| 10                      | 61.24     | 1.19      |
| 100                     | 38.32     | 1.29      |

## Cytotoxicity assay of 4g

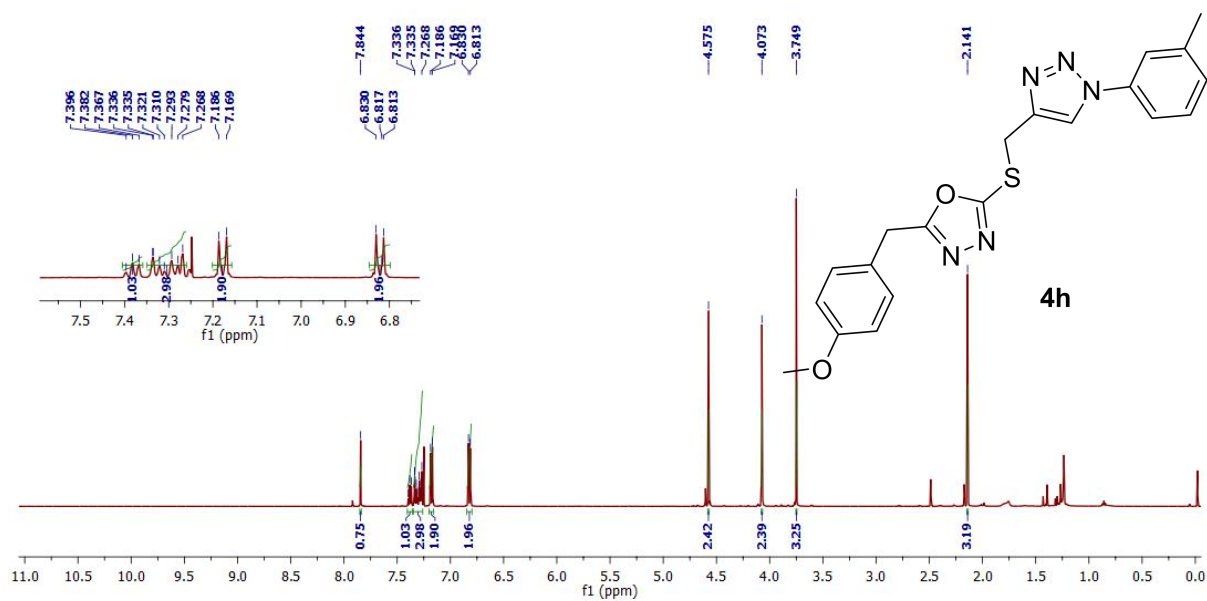

<sup>1</sup>H NMR of 4h

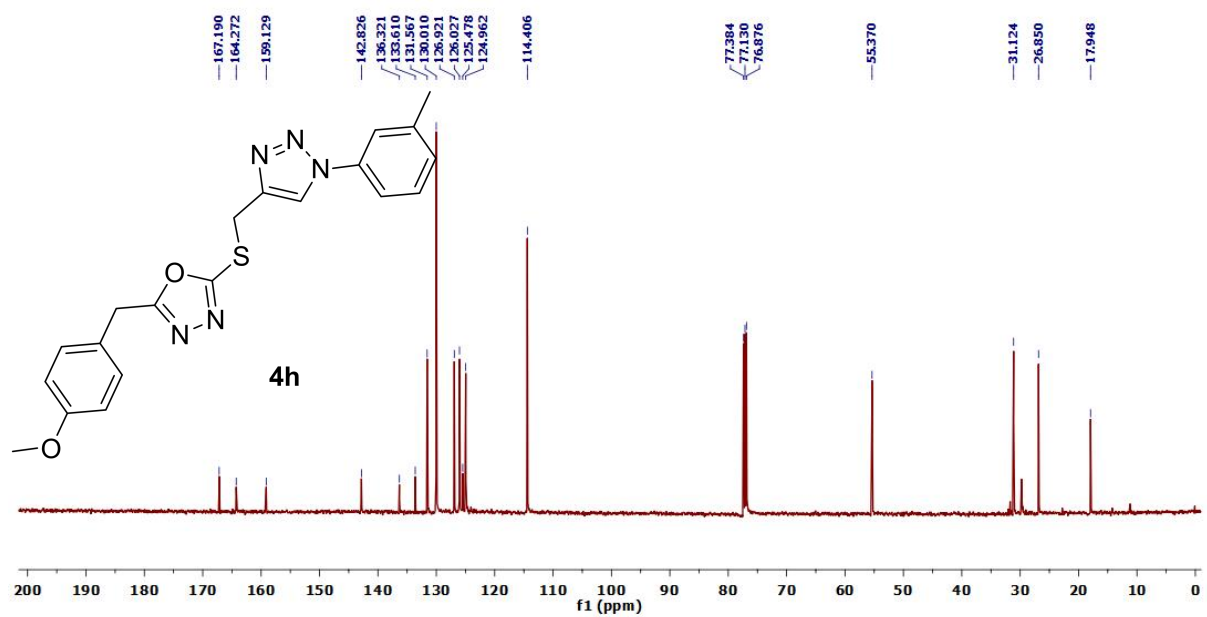

<sup>13</sup>C NMR of 4h

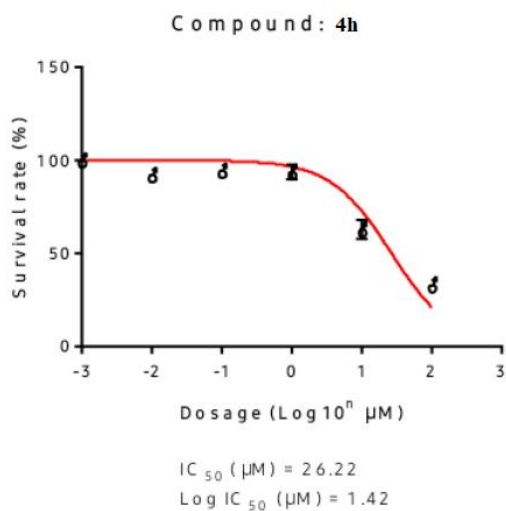

- Cell line: MCF-7 (2000 cells/per well<sup>96</sup>-well plate)
- Treated time: 72hrs
- Assay: alamarBlue (4hrs incubated)
- Data: **4h**

| Conc. ( $\mu\text{M}$ ) | Viability |           |
|-------------------------|-----------|-----------|
|                         | AVE.      | $\pm$ SD. |
| 0                       | 100.00    | 0.89      |
| 0.01                    | 92.00     | 1.86      |
| 0.1                     | 94.38     | 1.70      |
| 1                       | 93.81     | 4.02      |
| 10                      | 62.82     | 4.93      |
| 100                     | 33.08     | 1.38      |

### Cytotoxicity assay of **4h**

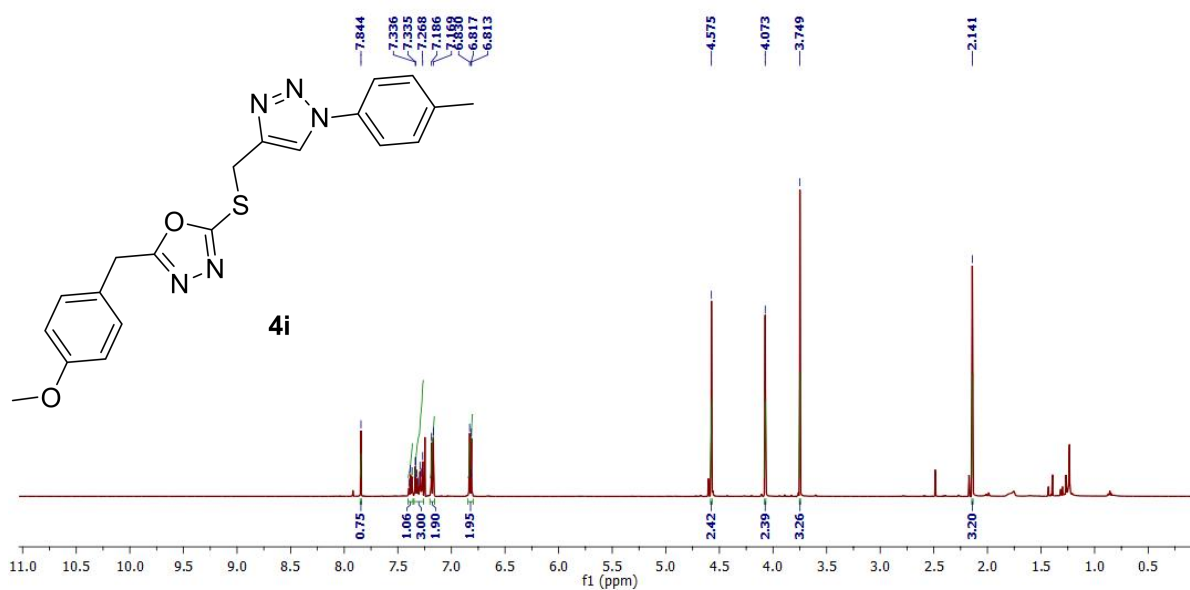

### $^1\text{H}$ NMR of **4i**

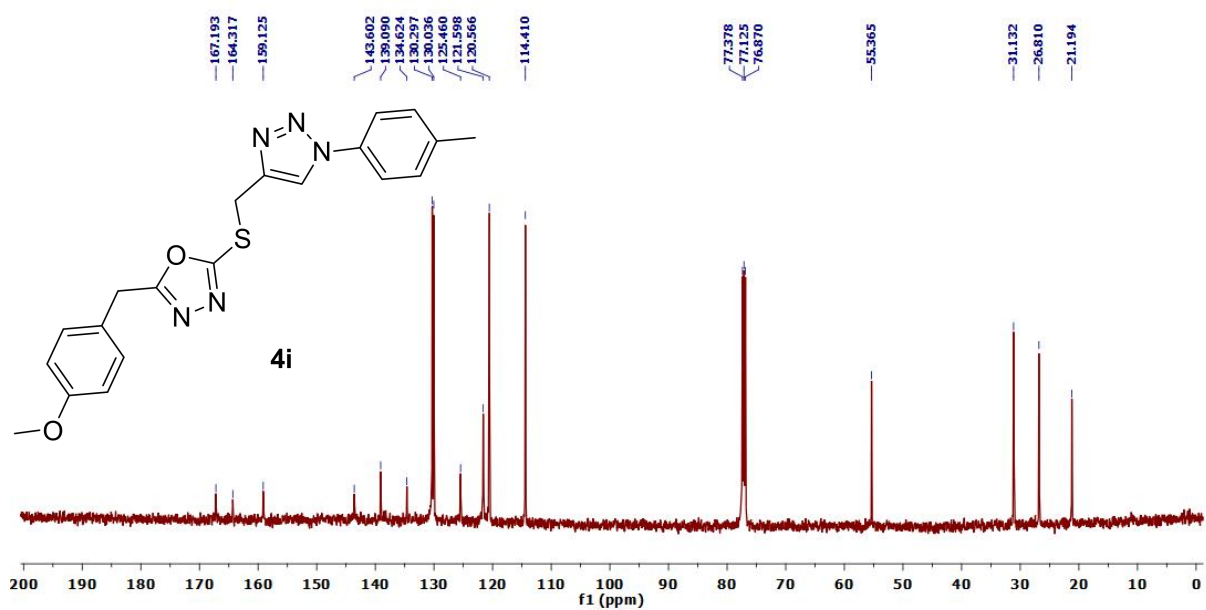

<sup>13</sup>C NMR of **4i**

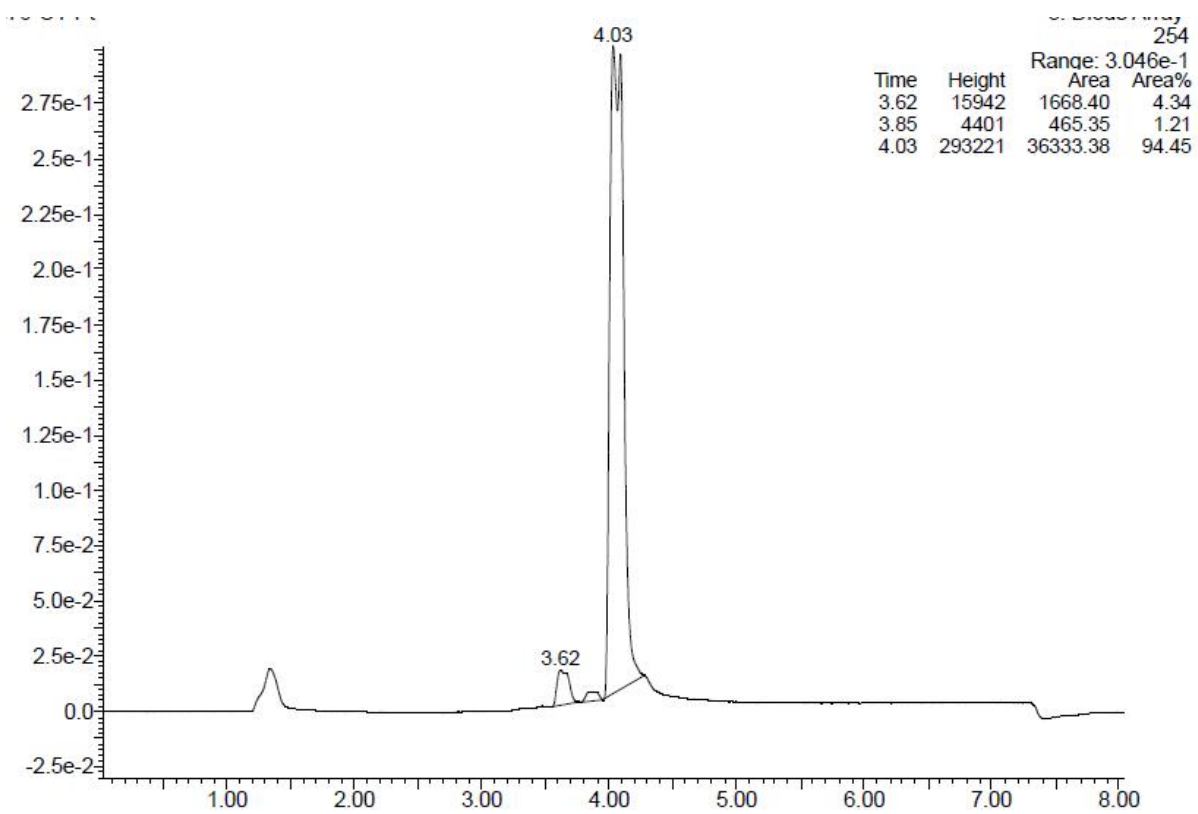

Liquid chromatogram of **4i**



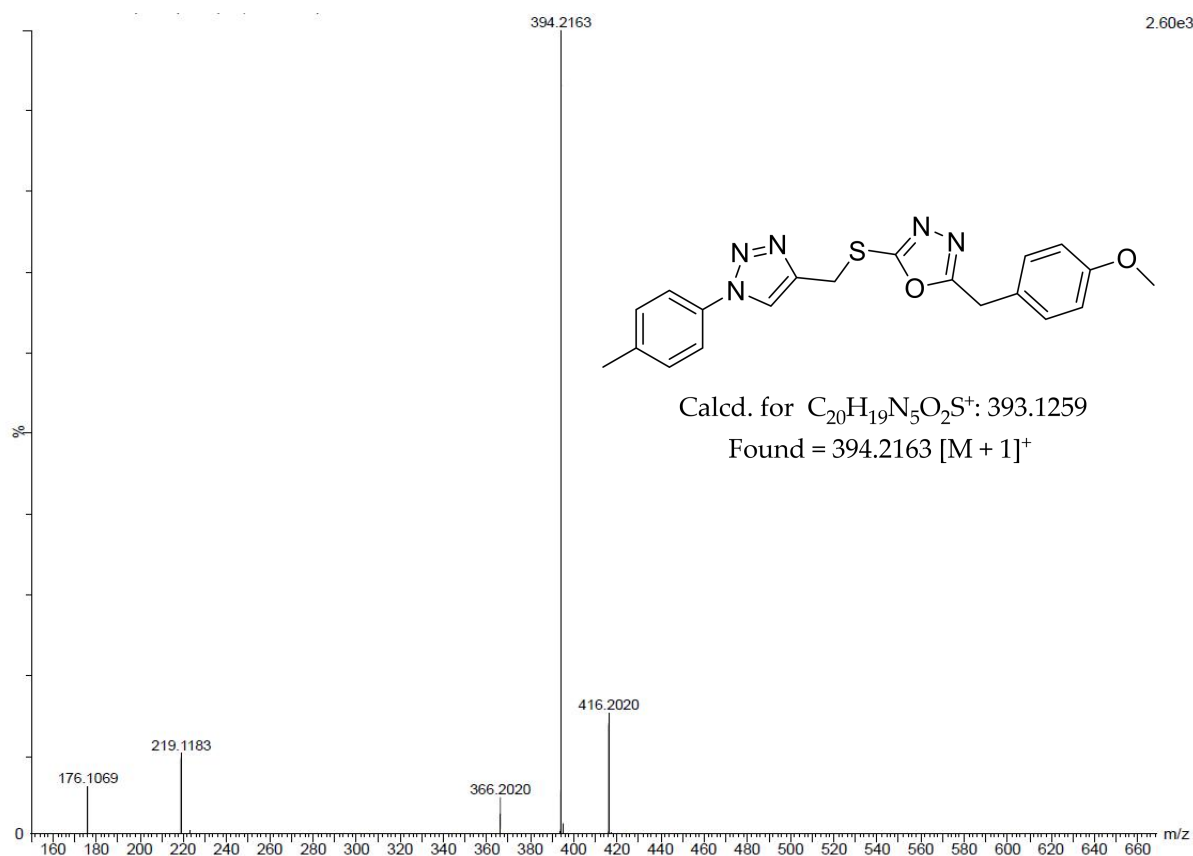

Mass spectra of **4i**

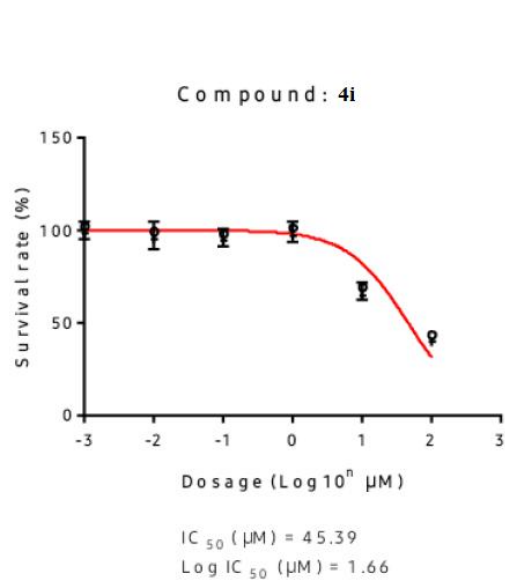

- Cell line: MCF-7 (2000 cells/per well<sup>96</sup>-well plate)
- Treated time: 72hrs
- Assay: alamarBlue (4hrs incubated)
- Data: **4i**

| Conc. ( $\mu\text{M}$ ) | Viability |           |
|-------------------------|-----------|-----------|
|                         | AVE.      | $\pm$ SD. |
| 0                       | 100.00    | 4.39      |
| 0.01                    | 97.05     | 7.43      |
| 0.1                     | 96.06     | 4.82      |
| 1                       | 99.11     | 5.58      |
| 10                      | 67.03     | 4.60      |
| 100                     | 41.41     | 1.38      |

Cytotoxicity assay of **4i**

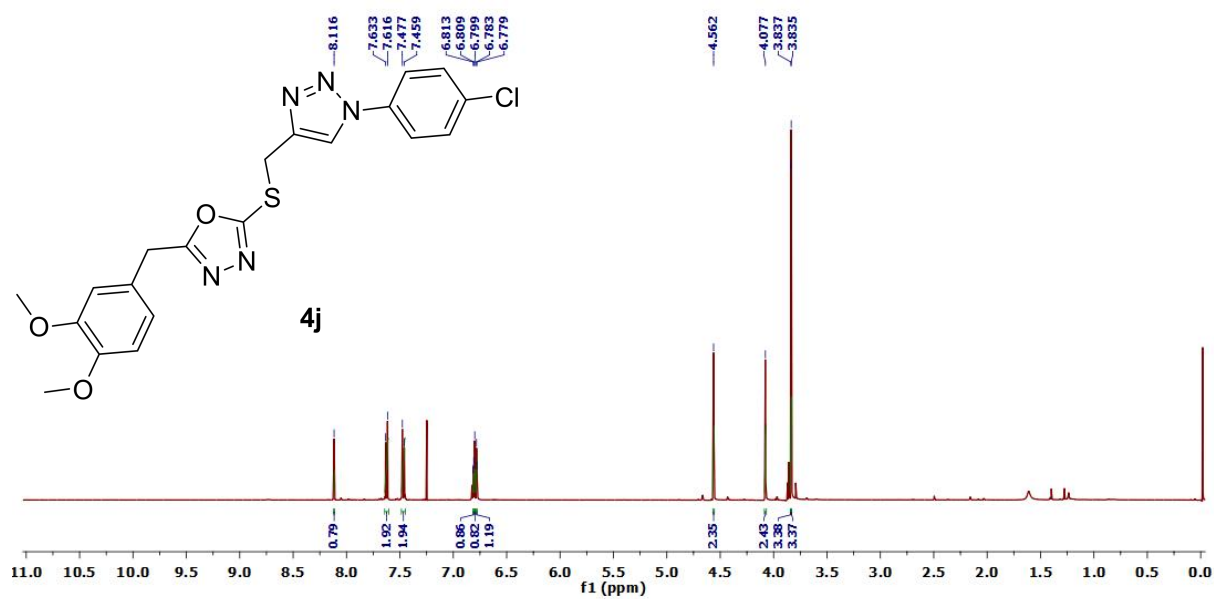

<sup>1</sup>H NMR of **4j**

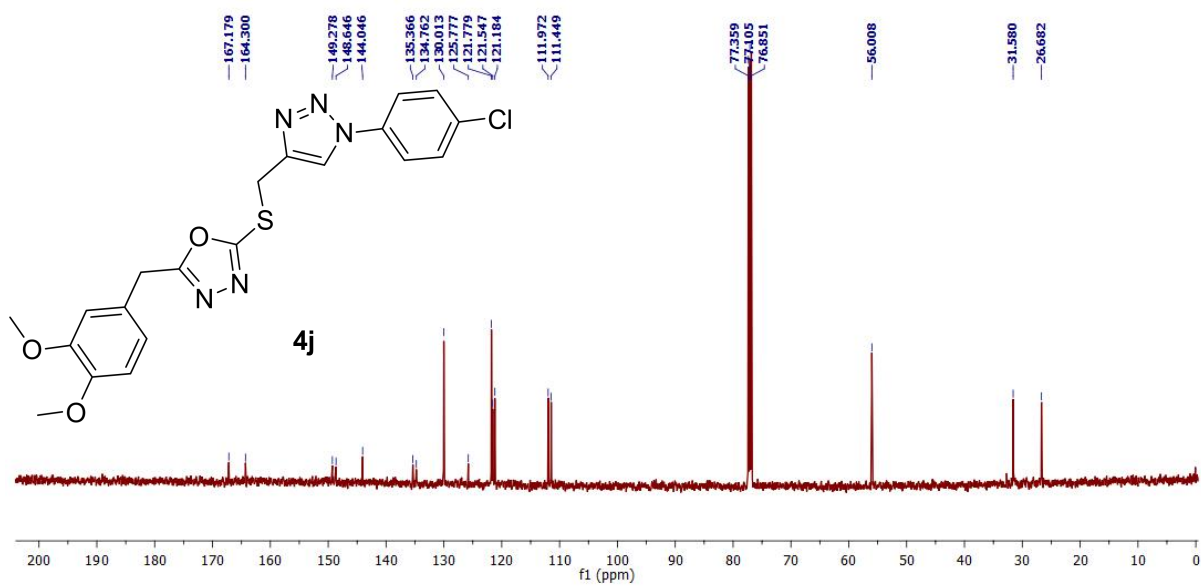

<sup>13</sup>C NMR of **4j**

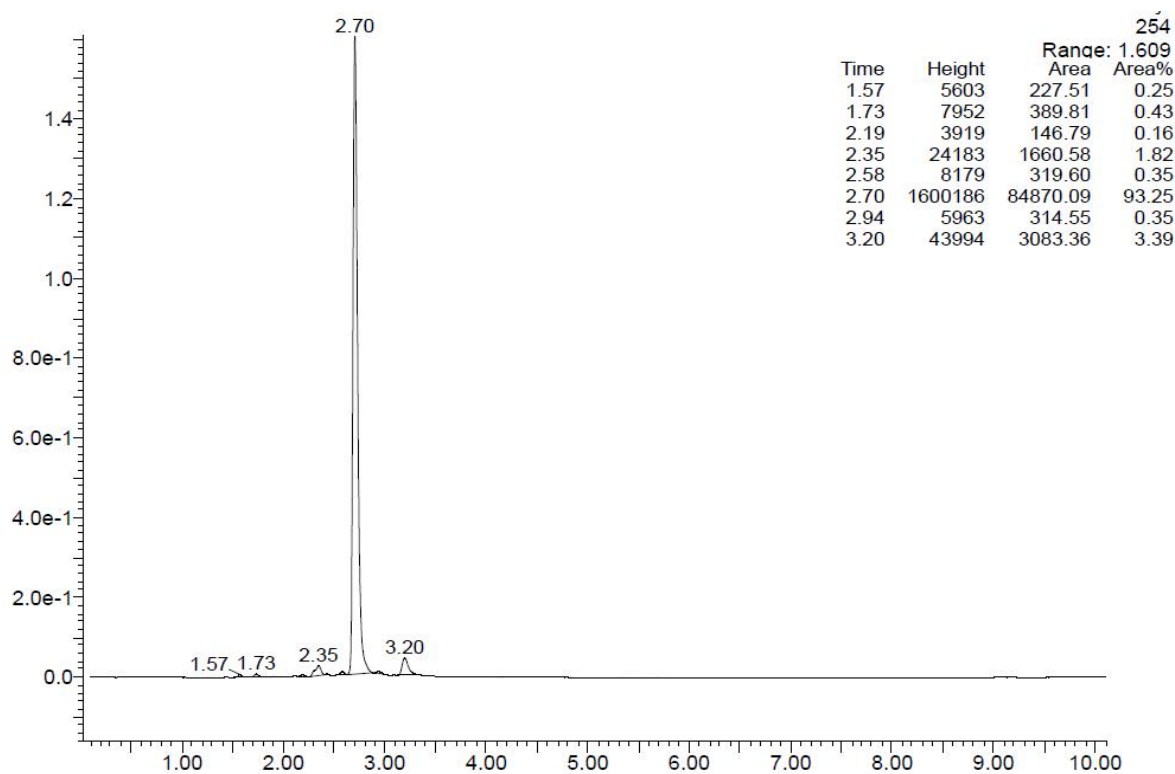

Liquid chromatogram of **4j**

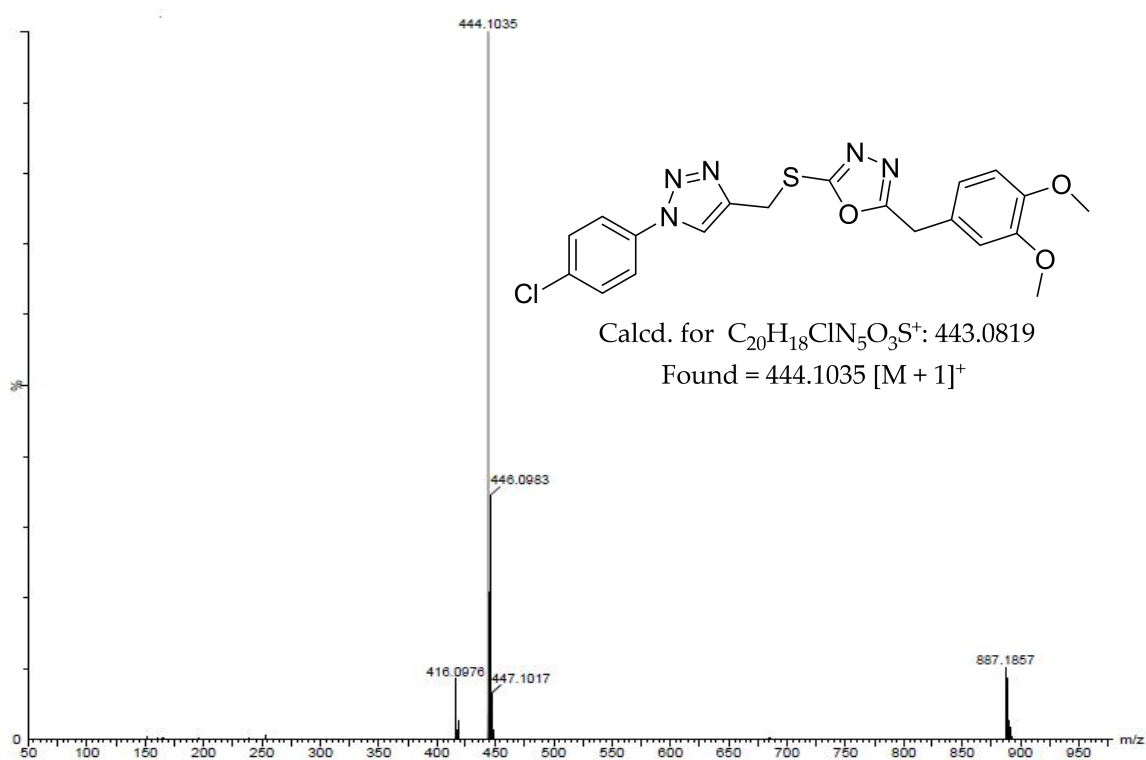

Mass spectra of **4j**

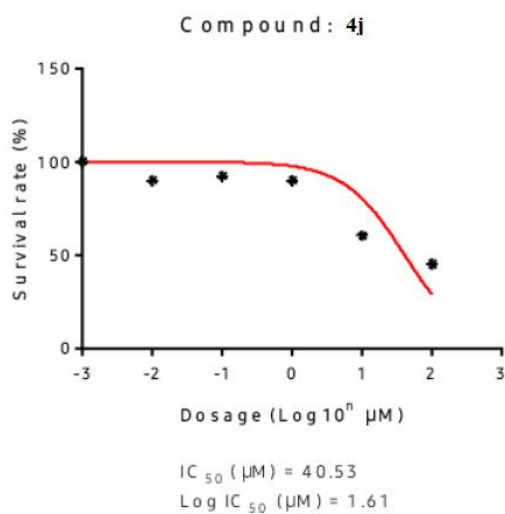

- Cell line: MCF-7 (2000 cells/per well<sup>96</sup>-well plate)
- Treated time: 72hrs
- Assay: alamarBlue (4hrs incubated)
- Data: **4j**

| Conc. ( $\mu\text{M}$ ) | Viability |           |
|-------------------------|-----------|-----------|
|                         | AVE.      | $\pm$ SD. |
| 0                       | 100.00    | 2.45      |
| 0.01                    | 89.98     | 2.34      |
| 0.1                     | 92.37     | 1.92      |
| 1                       | 89.75     | 2.73      |
| 10                      | 60.40     | 1.51      |
| 100                     | 45.16     | 0.89      |

### Cytotoxicity assay of **4j**

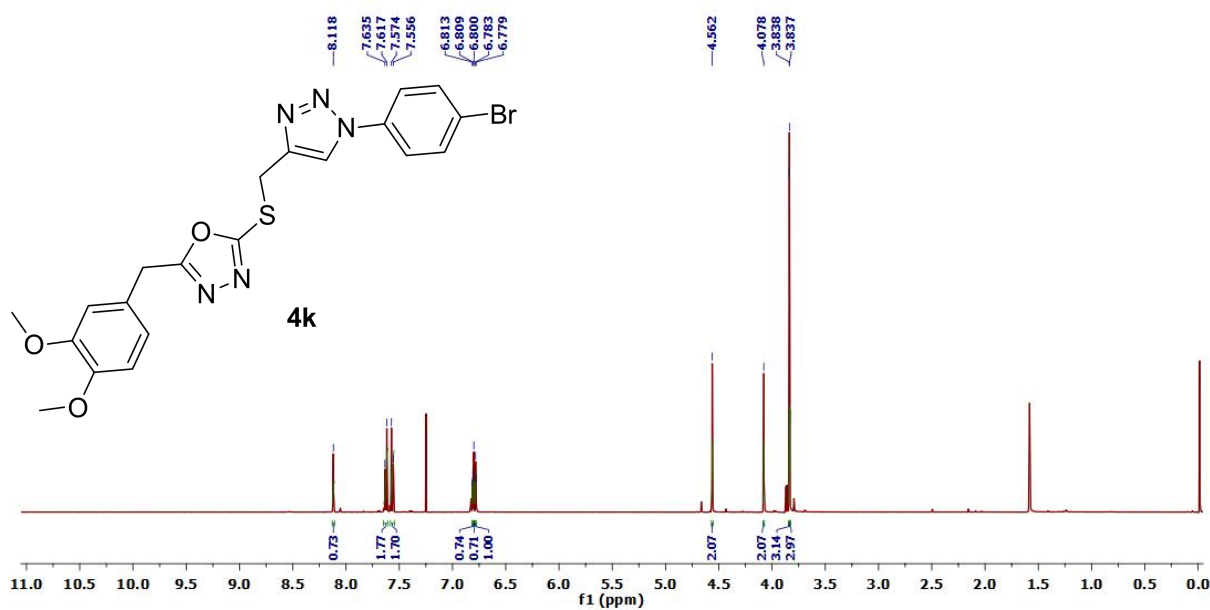

### $^1\text{H}$ NMR of **4k**

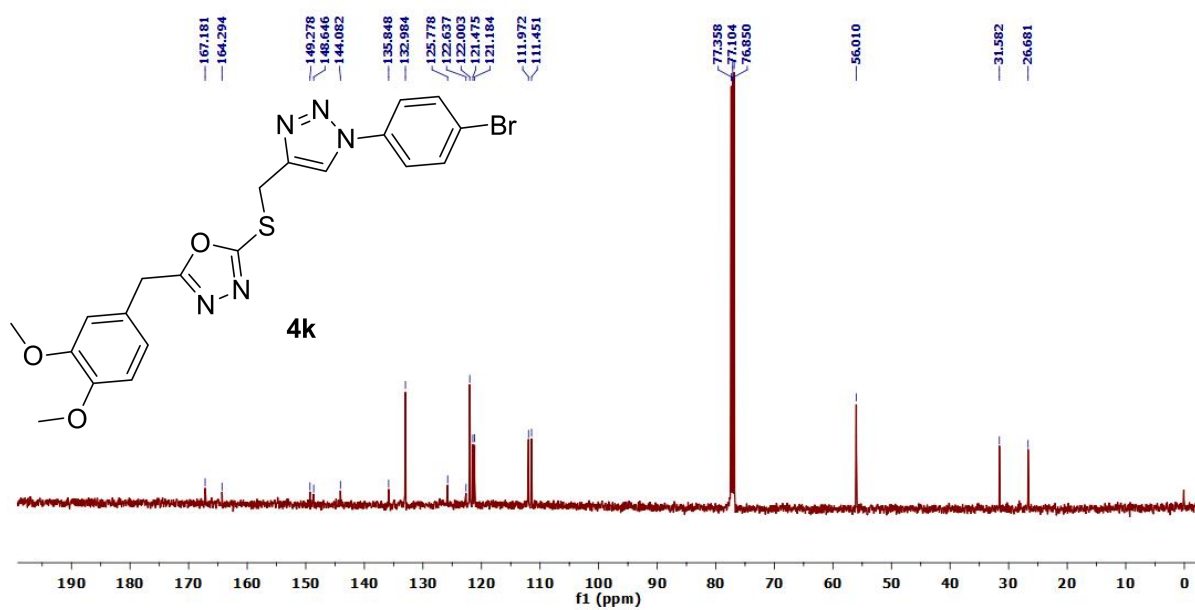

<sup>13</sup>C NMR of **4k**

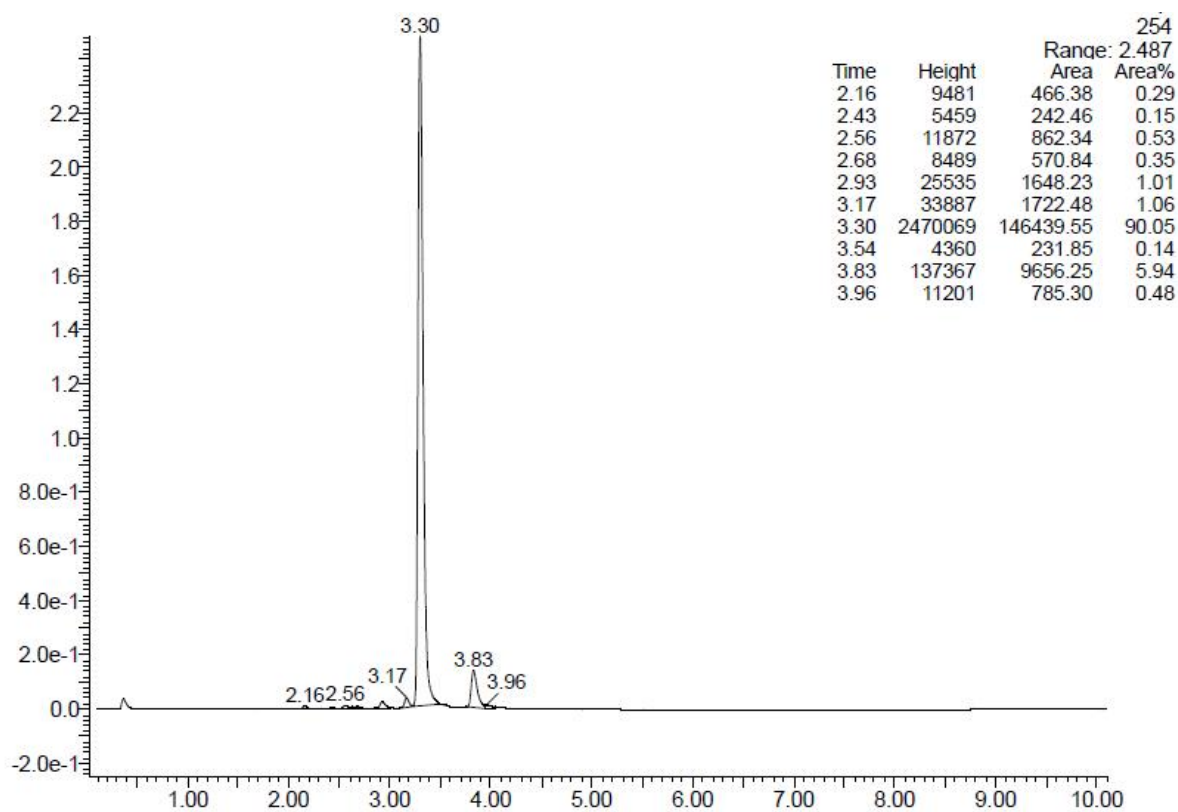

Liquid chromatogram of **4k**

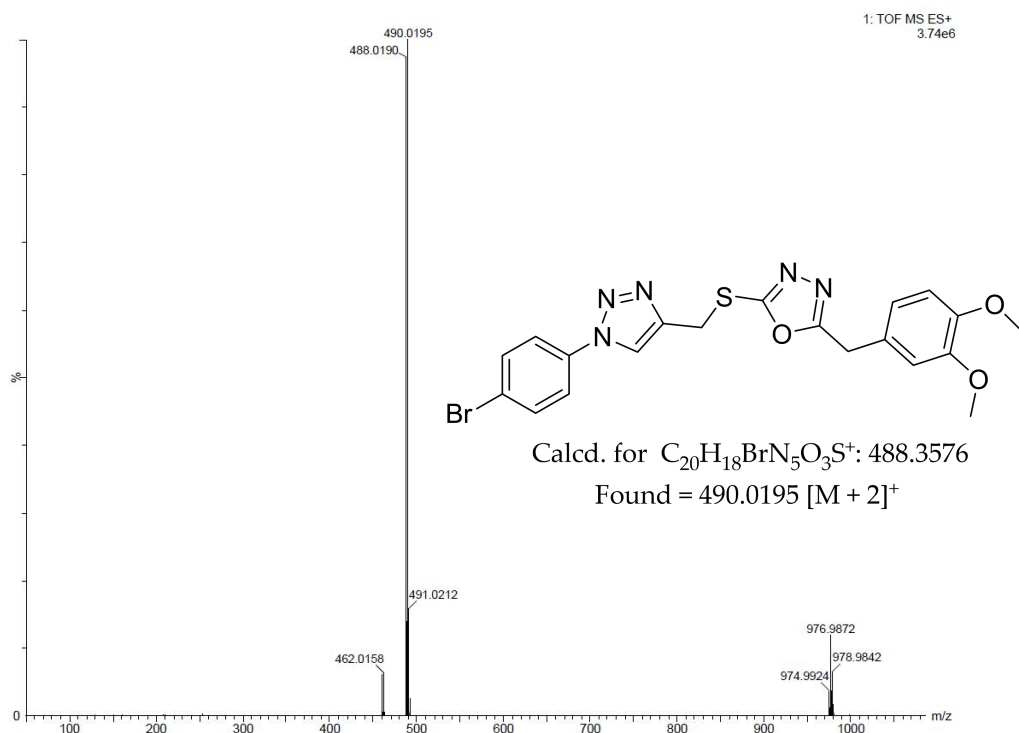

Mass spectra of **4k**

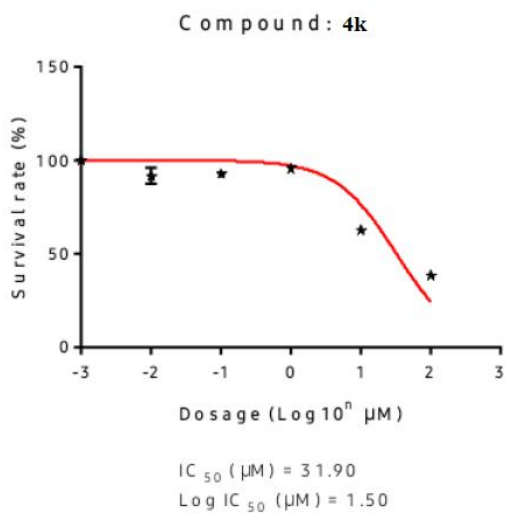

- Cell line: MCF-7 (2000 cells/per well<sup>96</sup>-well plate)
- Treated time: 72hrs
- Assay: alamarBlue (4hrs incubated)
- Data: **4k**

| Conc. ( $\mu\text{M}$ ) | Viability |           |
|-------------------------|-----------|-----------|
|                         | AVE.      | $\pm$ SD. |
| 0                       | 100.00    | 2.45      |
| 0.01                    | 91.51     | 4.45      |
| 0.1                     | 92.52     | 1.81      |
| 1                       | 95.54     | 1.54      |
| 10                      | 62.40     | 2.35      |
| 100                     | 38.16     | 0.24      |

Cytotoxicity assay of **4k**

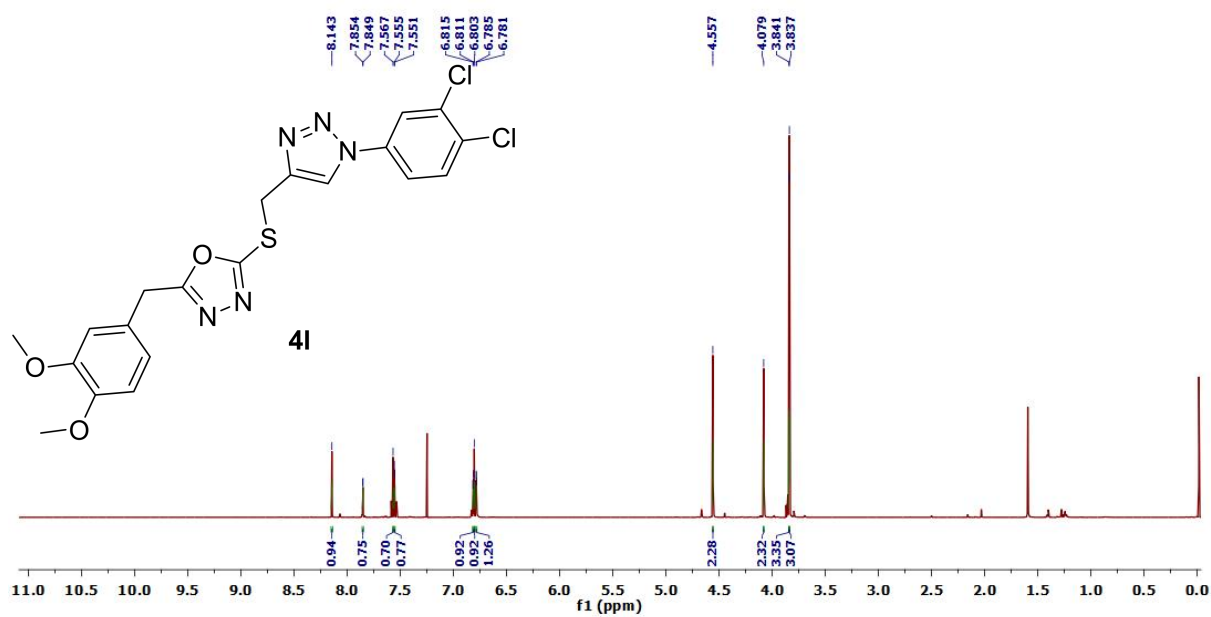

<sup>1</sup>H NMR of 4l

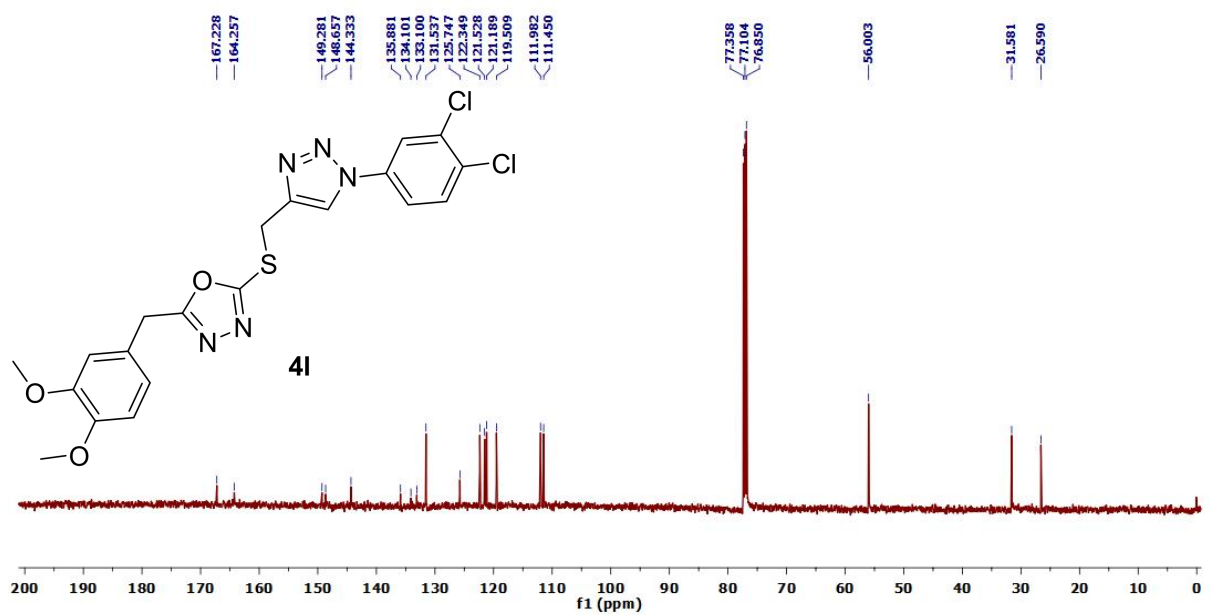

<sup>13</sup>C NMR of 4l

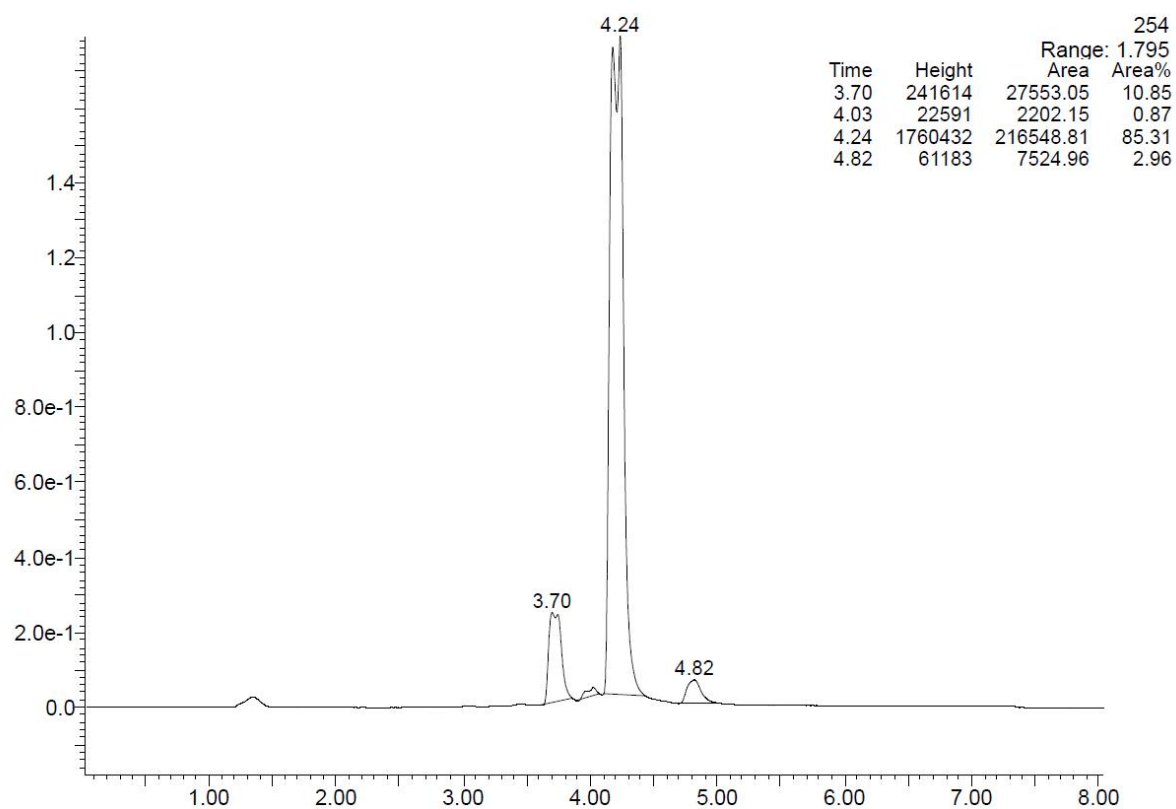

Liquid chromatogram of 41



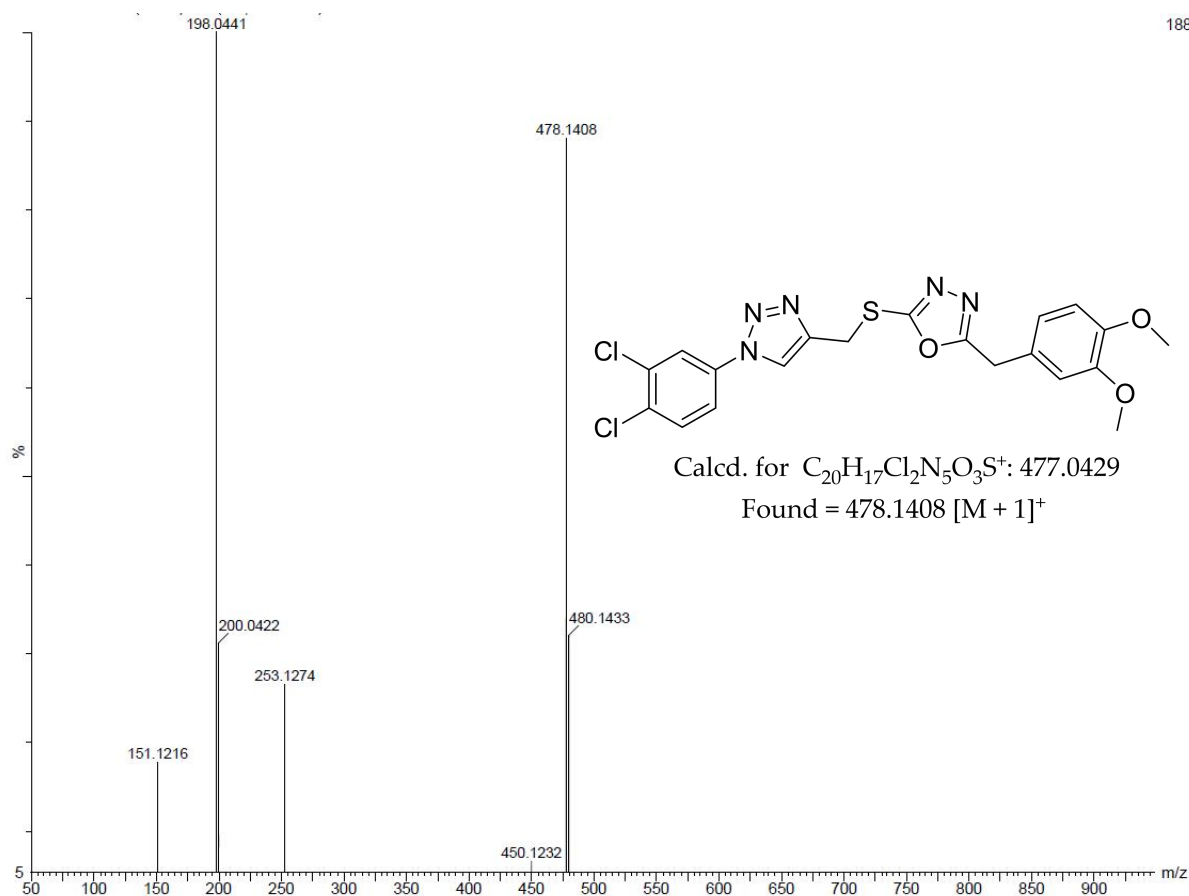Mass spectra of **41**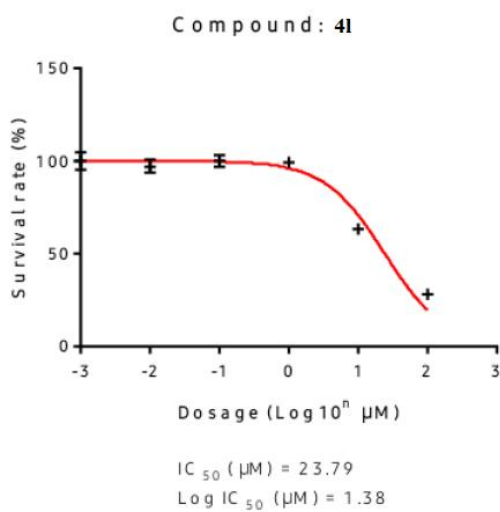

- Cell line: MCF-7 (2000 cells/per well<sup>96</sup>-well plate)
- Treated time: 72hrs
- Assay: alamarBlue (4hrs incubated)
- Data: **41**

| Conc. ( $\mu\text{M}$ ) | Viability |           |
|-------------------------|-----------|-----------|
|                         | AVE.      | $\pm$ SD. |
| 0                       | 100.00    | 4.88      |
| 0.01                    | 97.10     | 3.69      |
| 0.1                     | 99.81     | 3.32      |
| 1                       | 98.95     | 2.06      |
| 10                      | 63.26     | 2.05      |
| 100                     | 28.07     | 0.86      |

Cytotoxicity assay of **41**

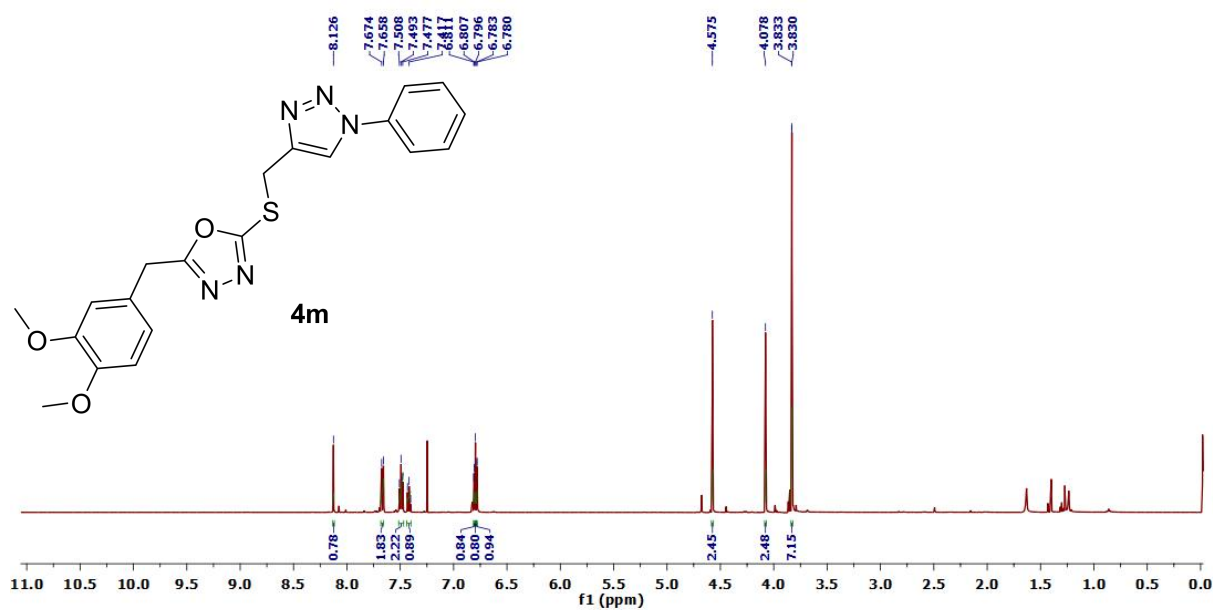

<sup>1</sup>H NMR of **4m**

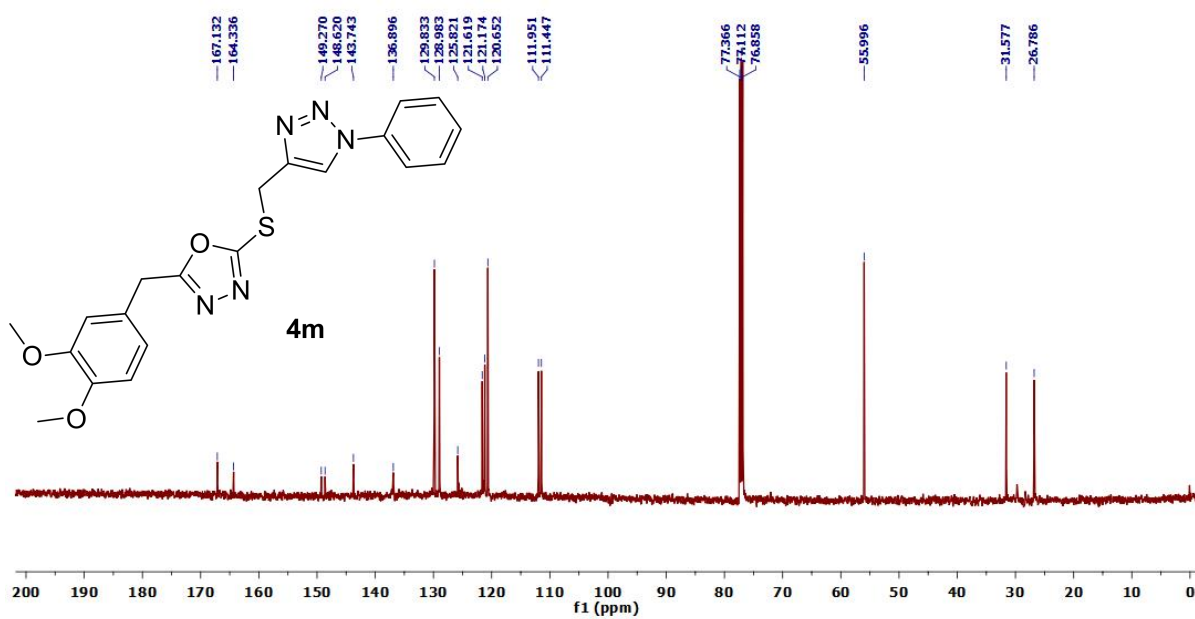

<sup>13</sup>C NMR of **4m**

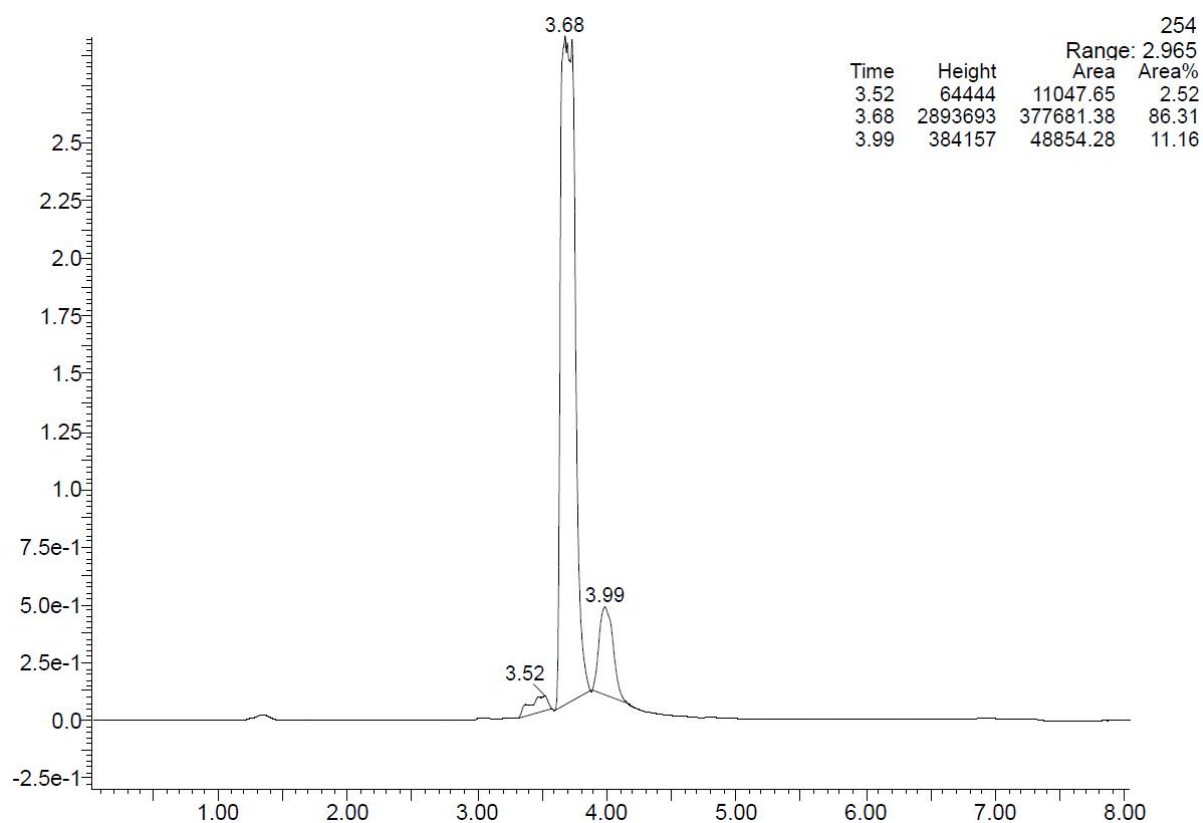

Liquid chromatogram of **4m**

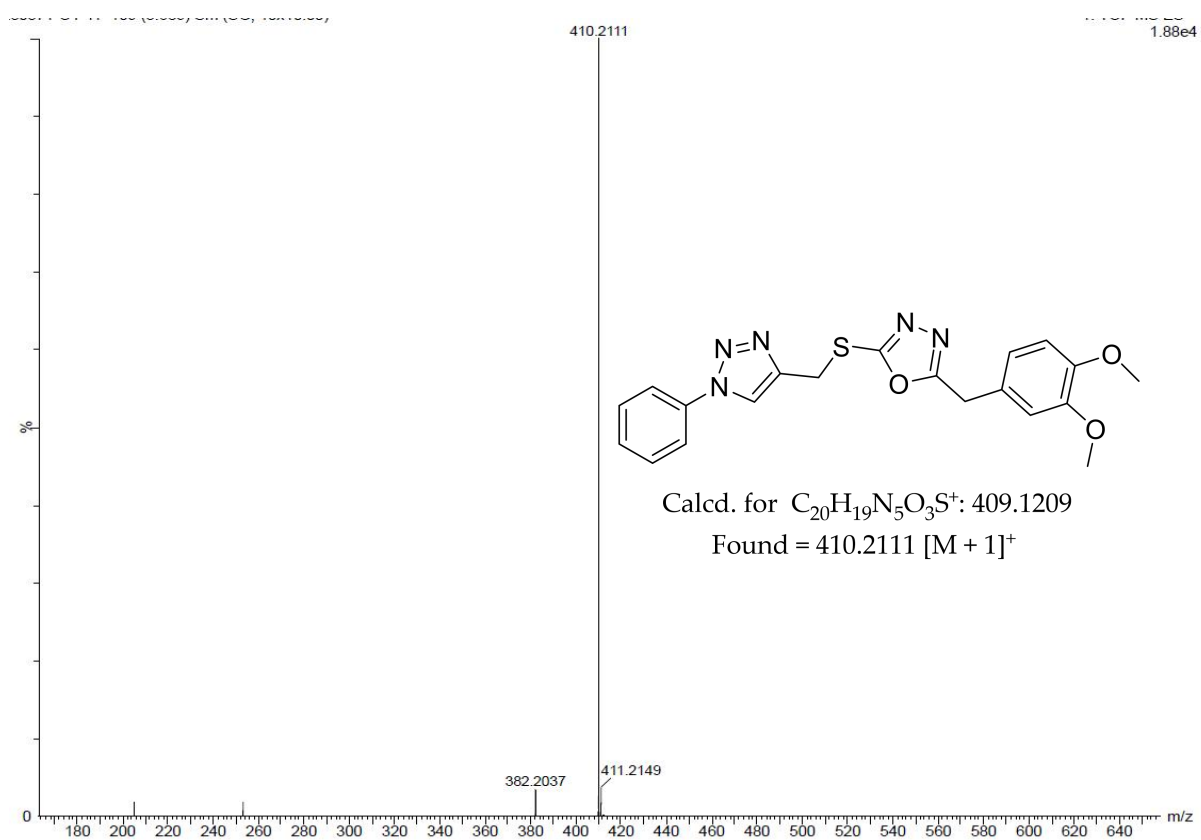

Mass spectra of **4m**

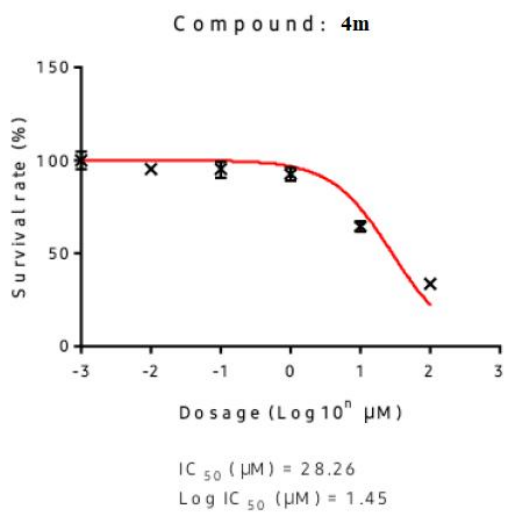

- Cell line: MCF-7 (2000 cells/per well<sup>96</sup>-well plate)
- Treated time: 72hrs
- Assay: alamarBlue (4hrs incubated)
- Data: **4m**

| Conc. ( $\mu\text{M}$ ) | Viability |           |
|-------------------------|-----------|-----------|
|                         | AVE.      | $\pm$ SD. |
| 0                       | 100.00    | 4.88      |
| 0.01                    | 95.48     | 1.53      |
| 0.1                     | 94.92     | 4.31      |
| 1                       | 92.58     | 3.55      |
| 10                      | 64.30     | 2.96      |
| 100                     | 33.66     | 0.82      |

Cytotoxicity assay of **4m**

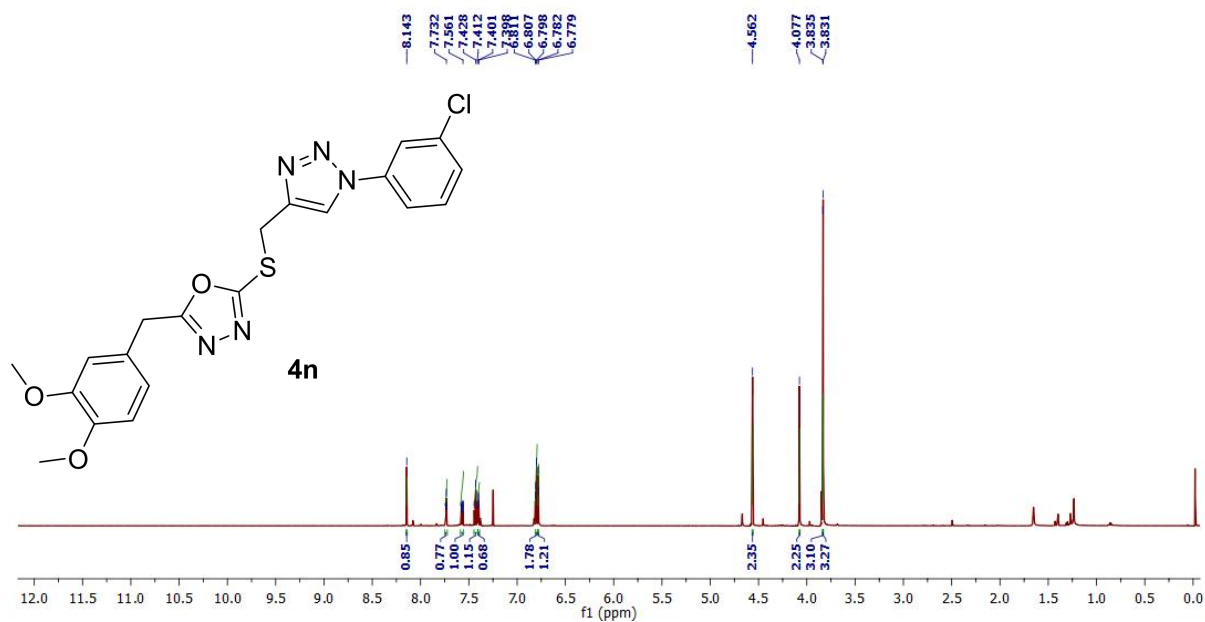

$^1\text{H}$  NMR of **4n**

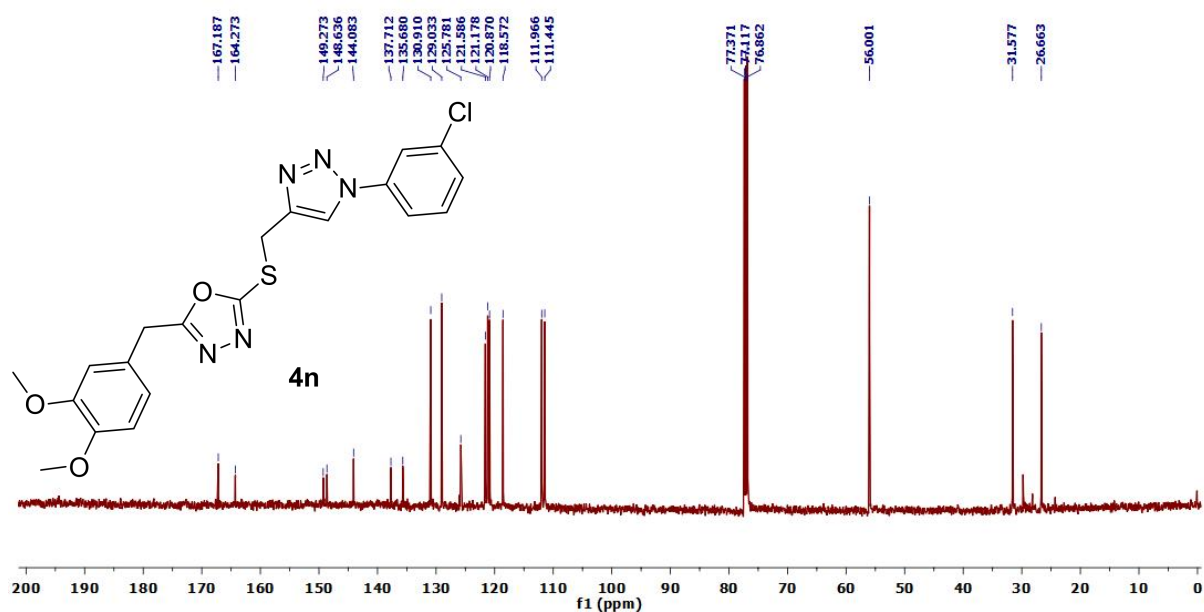

<sup>13</sup>C NMR of **4n**

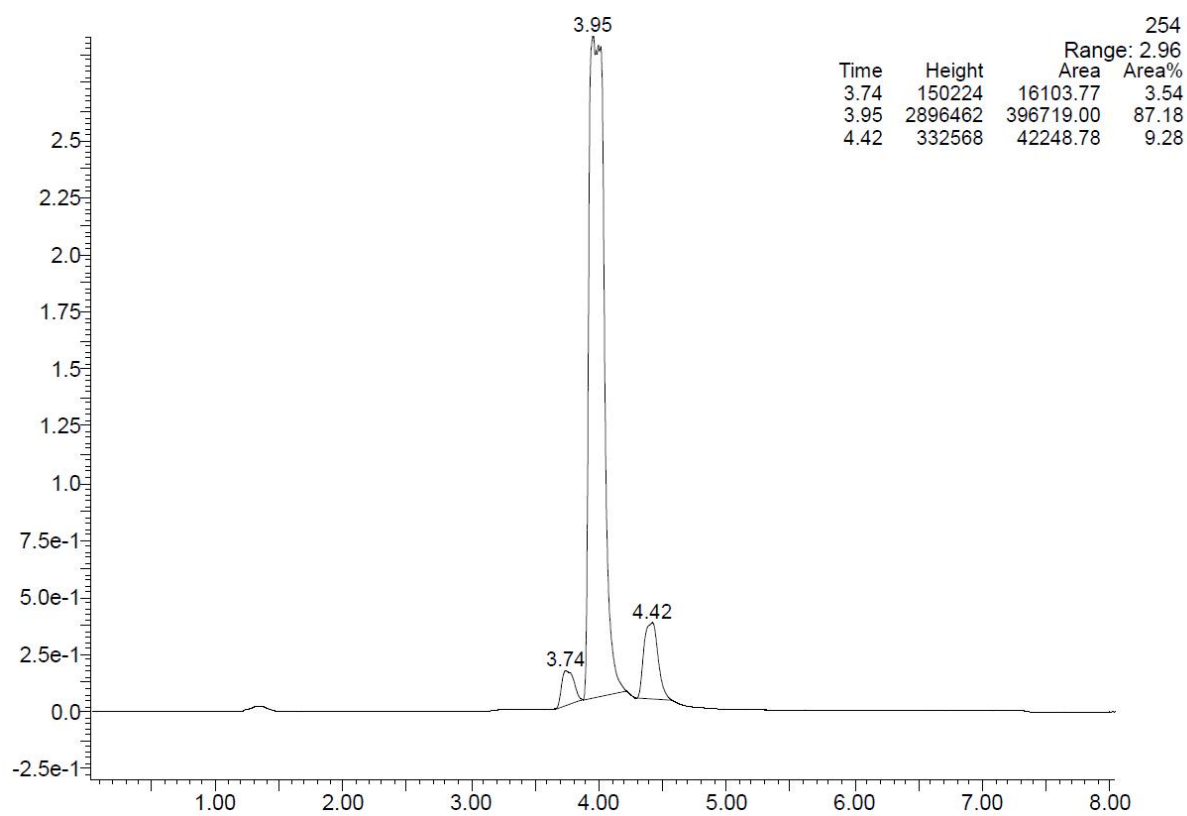

Liquid chromatogram of **4n**

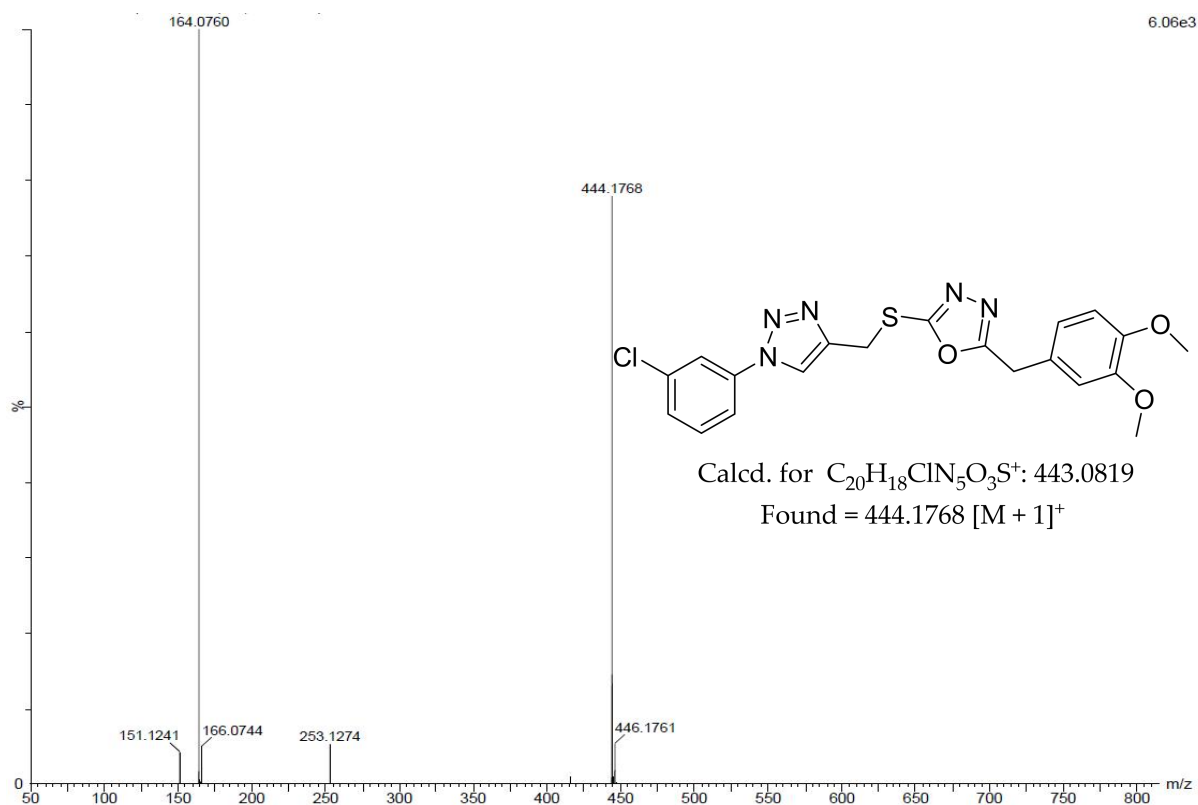

Mass spectra of **4n**

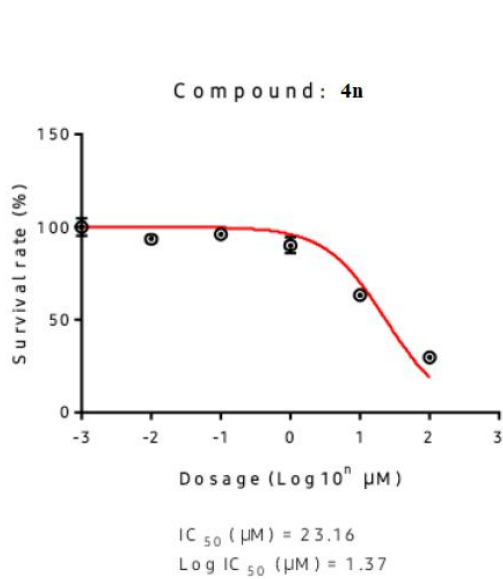

- Cell line: MCF-7 (2000 cells/per well<sup>96</sup>-well plate)
- Treated time: 72hrs
- Assay: alamarBlue (4hrs incubated)
- Data: **4n**

| Conc. ( $\mu M$ ) | Viability |           |
|-------------------|-----------|-----------|
|                   | AVE.      | $\pm$ SD. |
| 0                 | 100.00    | 4.88      |
| 0.01              | 93.34     | 2.45      |
| 0.1               | 95.85     | 1.55      |
| 1                 | 90.03     | 4.33      |
| 10                | 63.09     | 1.44      |
| 100               | 29.76     | 0.55      |

Cytotoxicity assay of **4n**

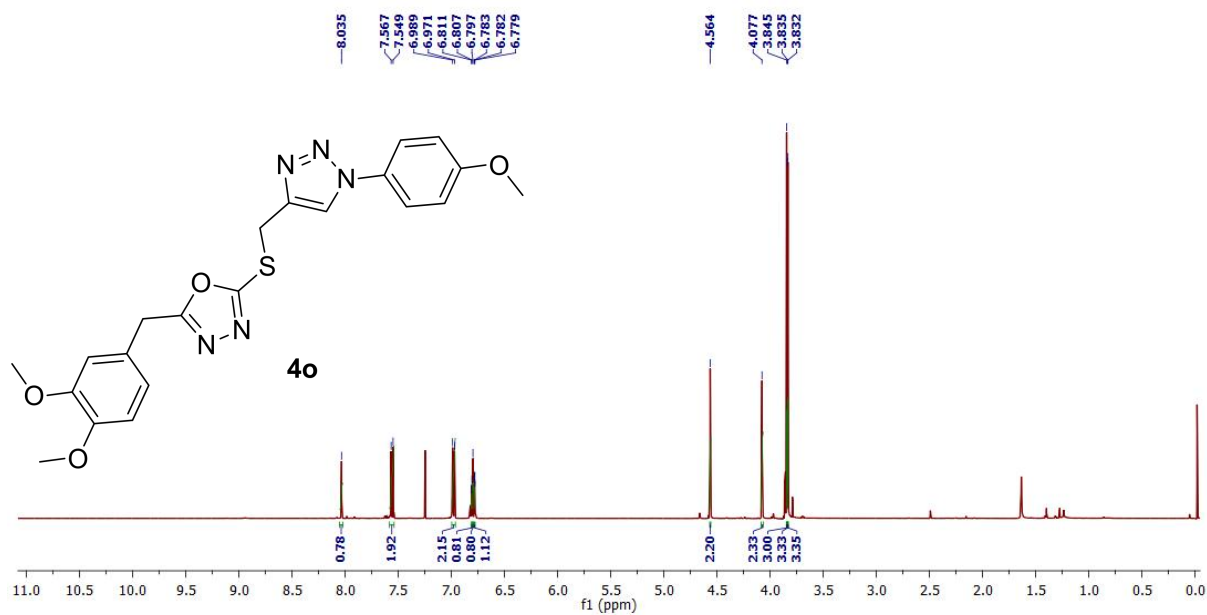

<sup>1</sup>H NMR of 4o

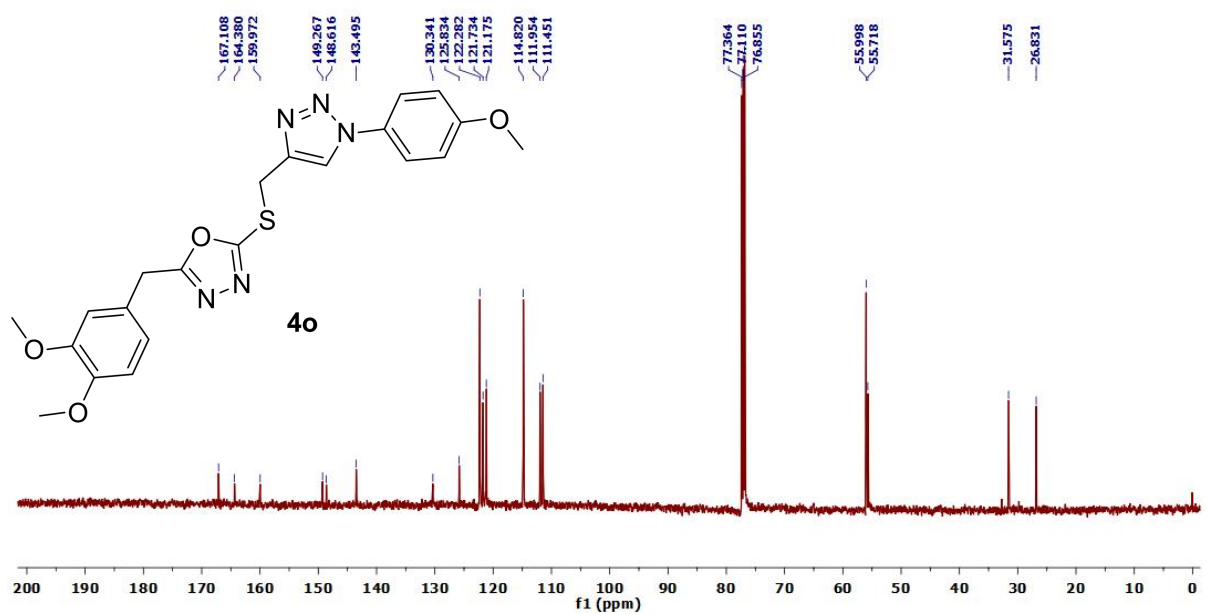

<sup>13</sup>C NMR of 4o

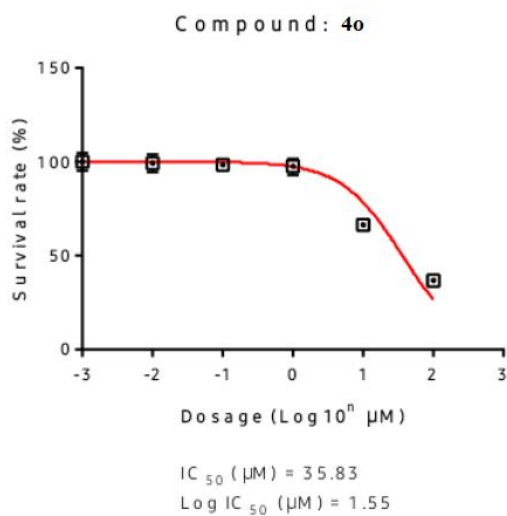

- Cell line: MCF-7 (2000 cells/per well<sup>96</sup>-well plate)
- Treated time: 72hrs
- Assay: alamarBlue (4hrs incubated)
- Data: 4o

| Conc. ( $\mu\text{M}$ ) | Viability |           |
|-------------------------|-----------|-----------|
|                         | AVE.      | $\pm$ SD. |
| 0                       | 100.00    | 4.88      |
| 0.01                    | 99.23     | 4.63      |
| 0.1                     | 98.28     | 2.95      |
| 1                       | 97.35     | 4.15      |
| 10                      | 66.42     | 1.91      |
| 100                     | 36.72     | 0.69      |

### Cytotoxicity assay of 4o

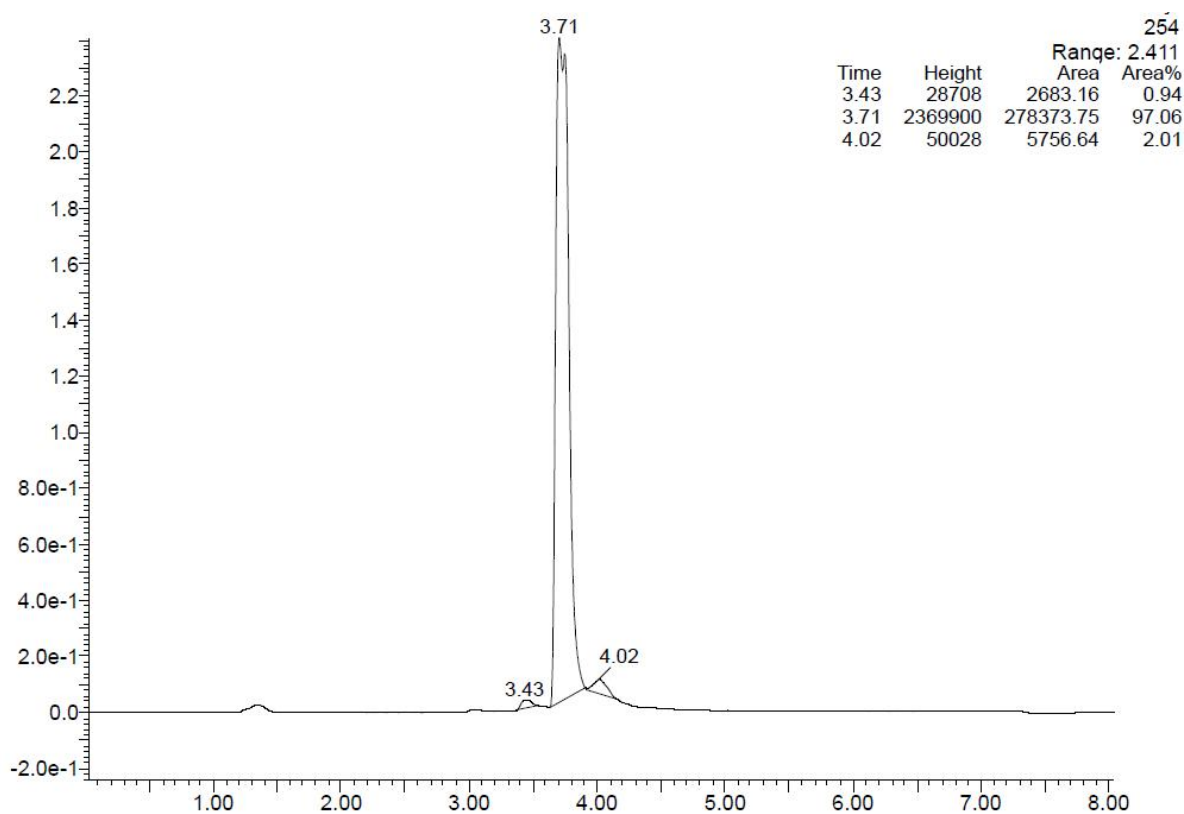

### Liquid chromatogram of 4o



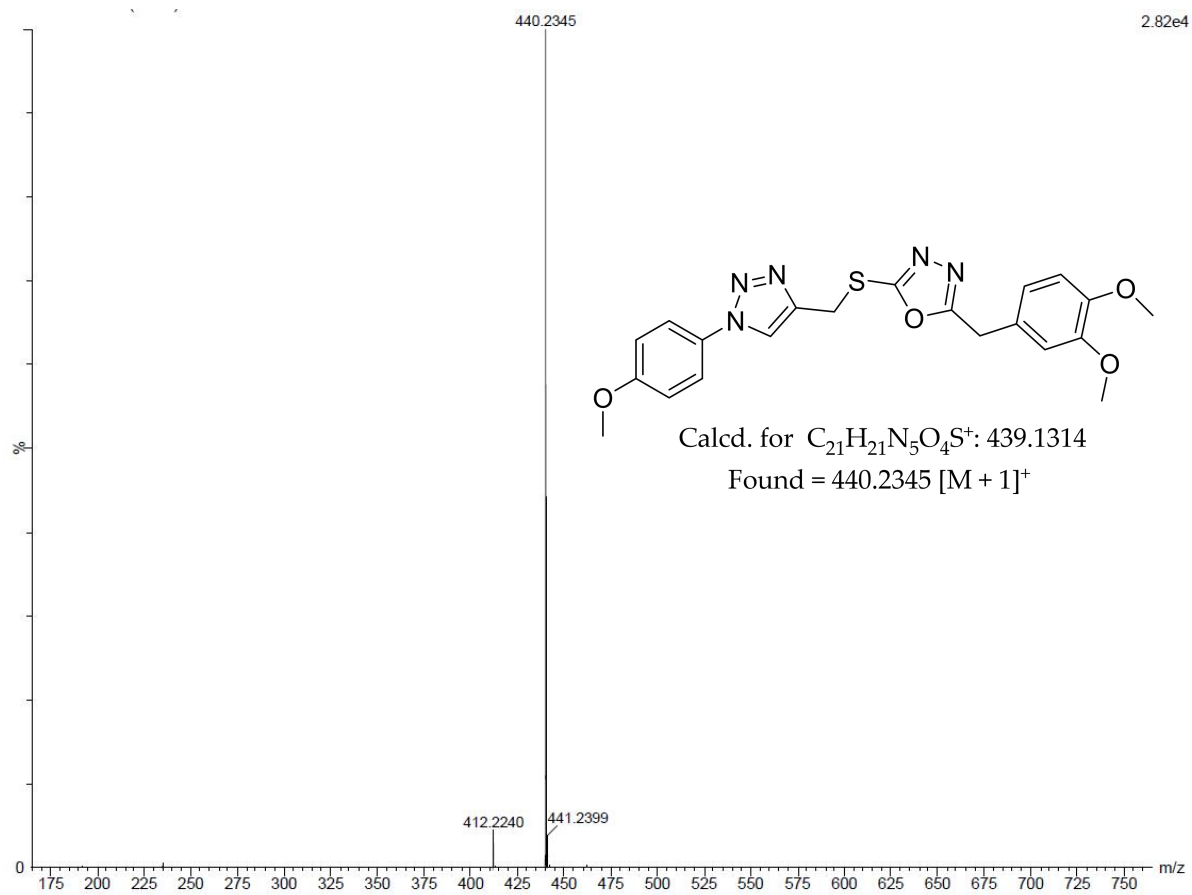

Mass spectra of **4o**

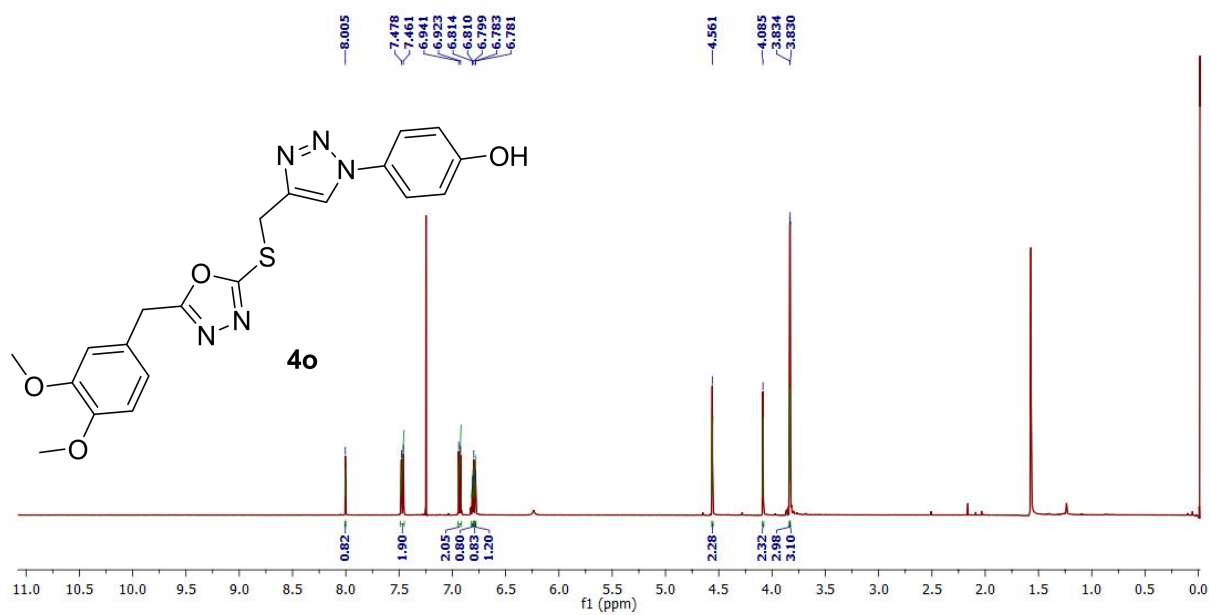

$^1H$  NMR of **4p**

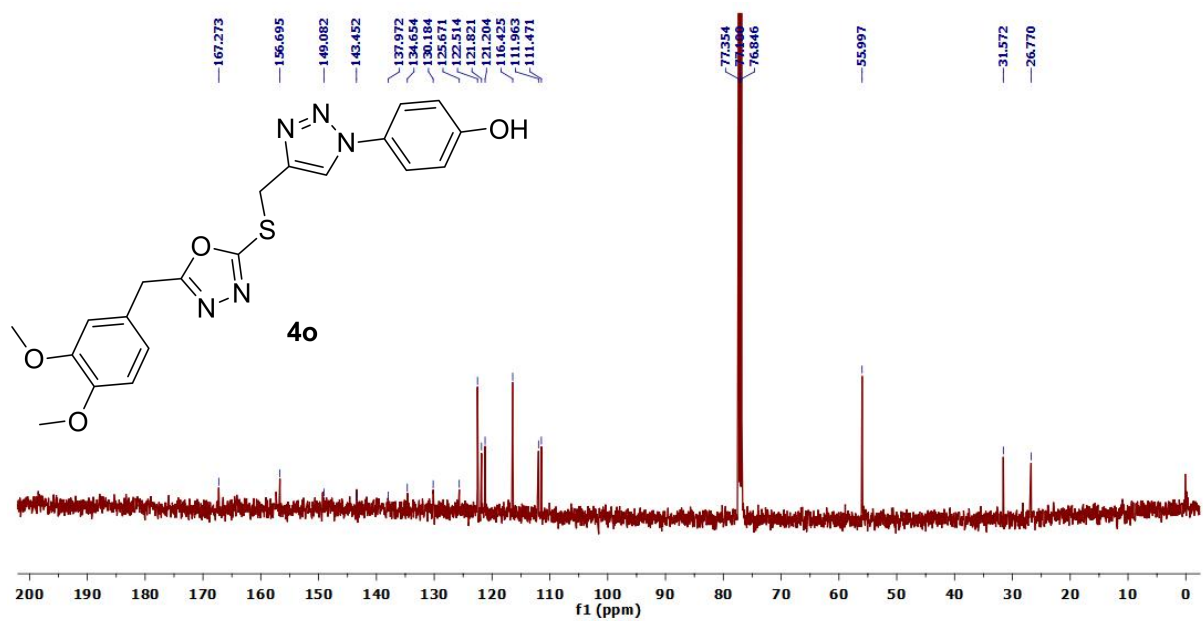

$^{13}\text{C}$  NMR of **4p**

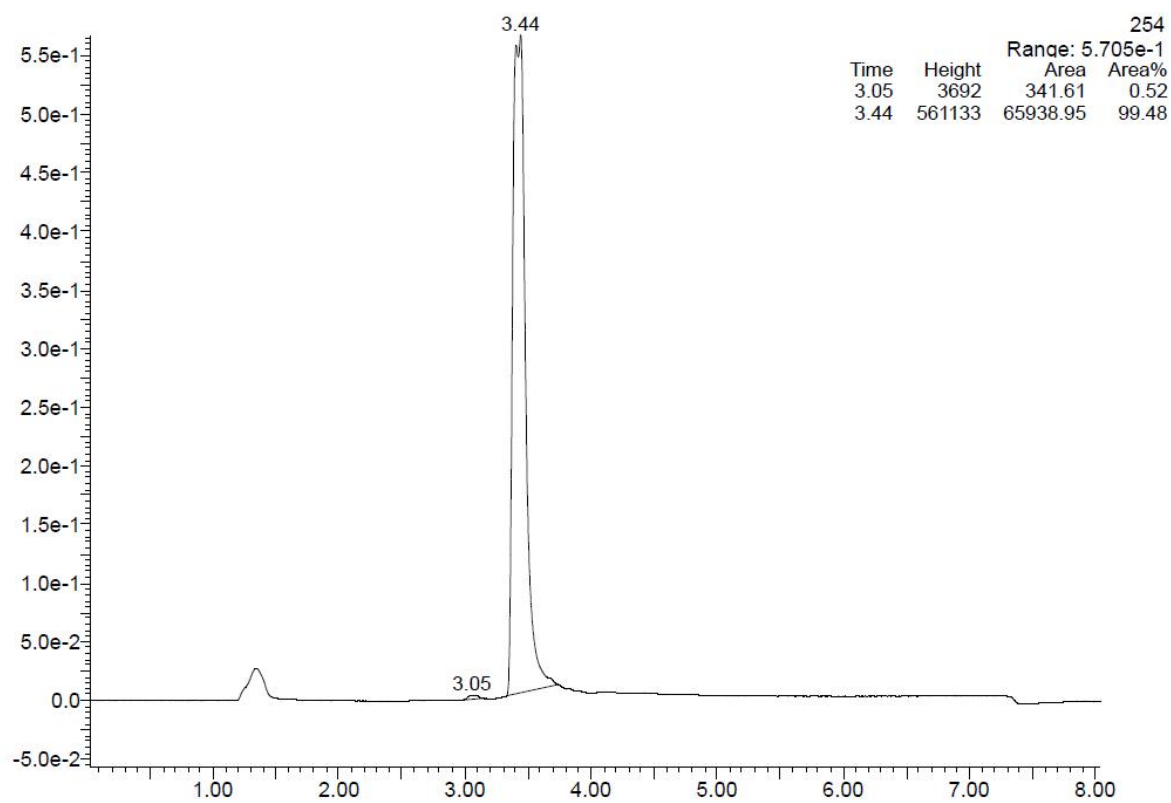

Liquid chromatogram of **4p**

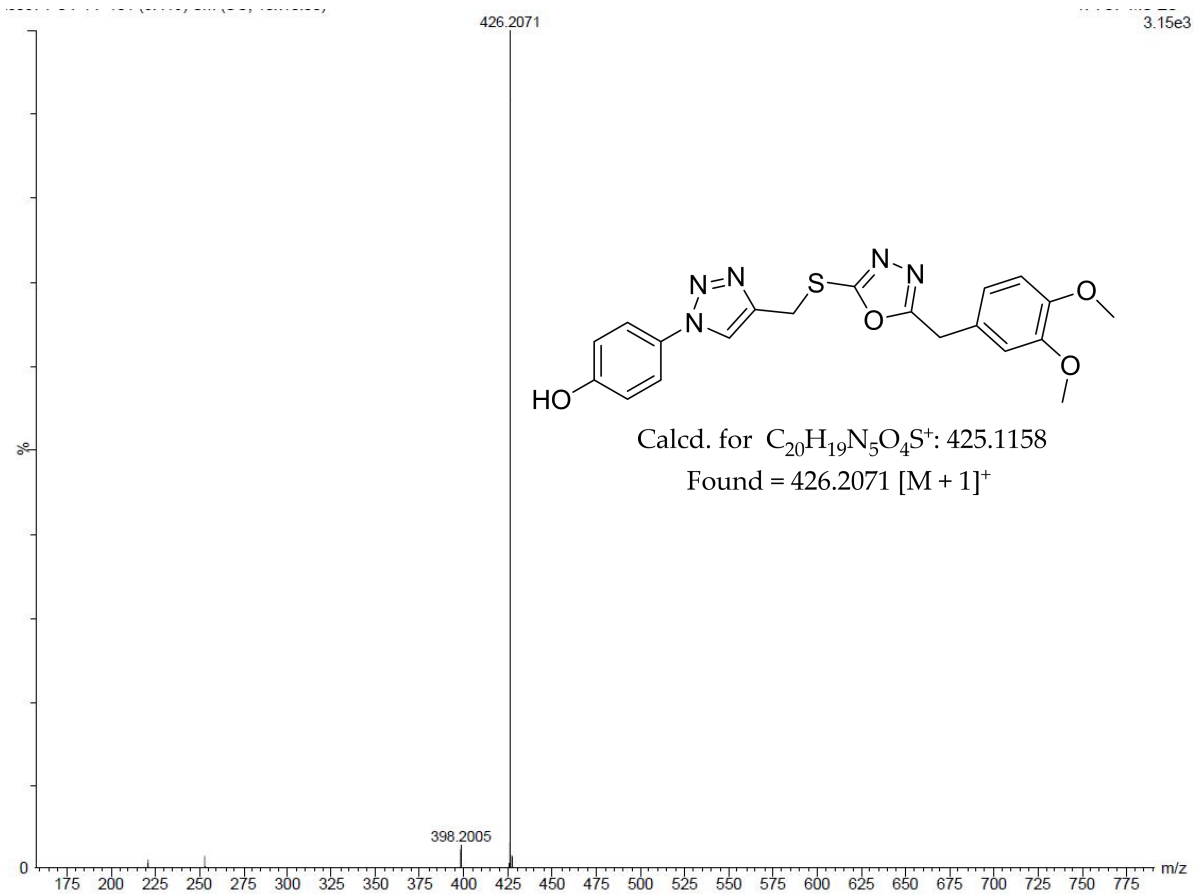

Mass spectra of **4p**

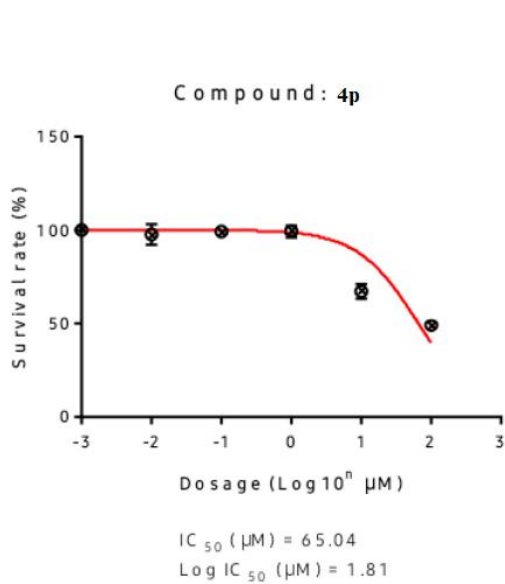

- Cell line: MCF-7 (2000 cells/per well (96-well plate))
- Treated time: 72hrs
- Assay: alamarBlue (4hrs incubated)
- Data: **4p**

| Conc. (μM) | Viability |       |
|------------|-----------|-------|
|            | AVE.      | ± SD. |
| 0          | 100.00    | 0.89  |
| 0.01       | 97.49     | 5.84  |
| 0.1        | 98.93     | 2.67  |
| 1          | 99.38     | 3.18  |
| 10         | 67.17     | 4.00  |
| 100        | 48.80     | 2.04  |

Cytotoxicity assay of **4p**

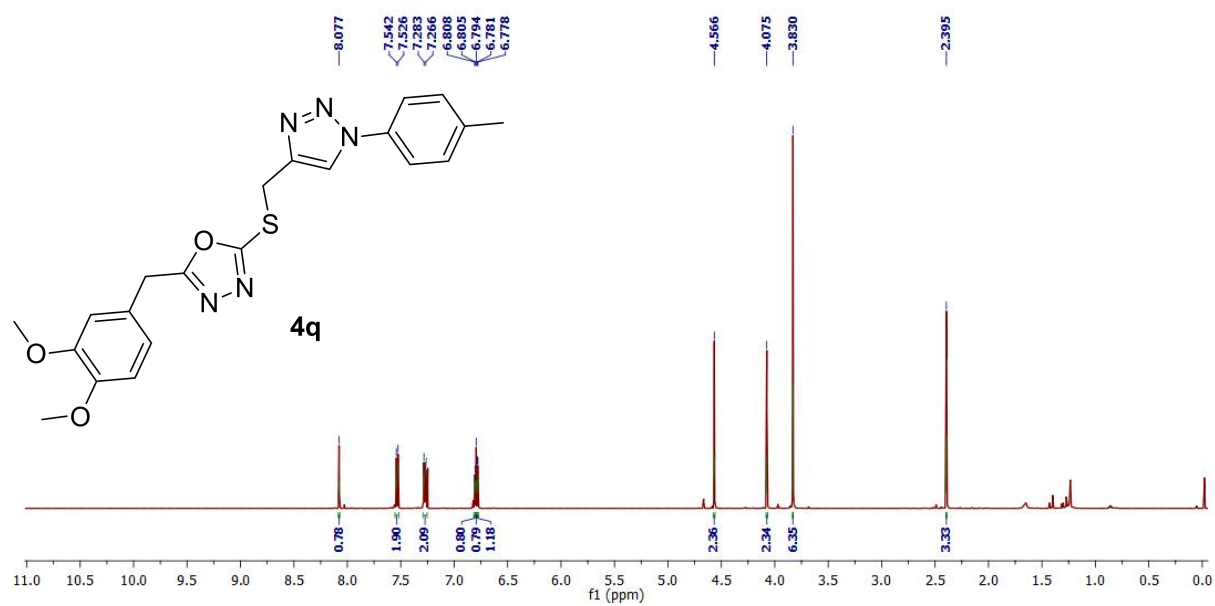

$^1\text{H}$  NMR of **4q**

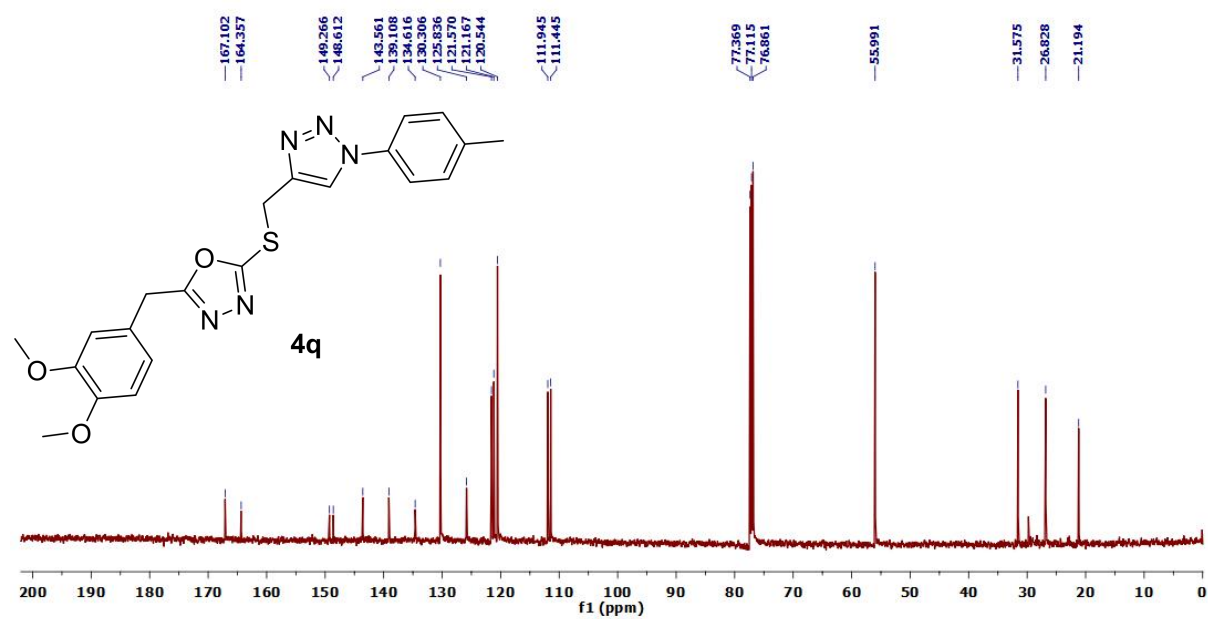

$^{13}\text{C}$  NMR of **4q**

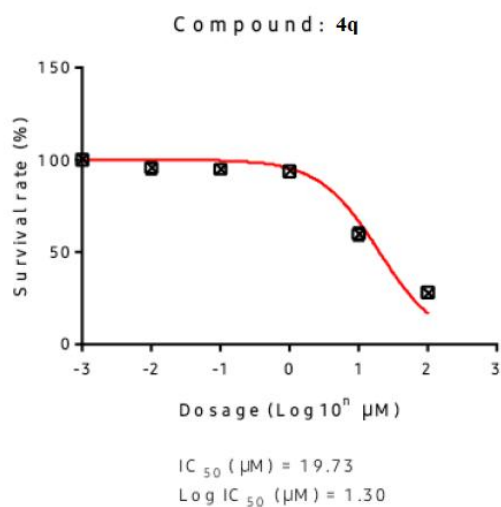

- Cell line: MCF-7 (2000 cells/per well<sup>96</sup>-well plate)
- Treated time: 72hrs
- Assay: alamarBlue (4hrs incubated)
- Data: 4q

| Conc. ( $\mu\text{M}$ ) | Viability |           |
|-------------------------|-----------|-----------|
|                         | AVE.      | $\pm$ SD. |
| 0                       | 100.00    | 0.89      |
| 0.01                    | 95.57     | 3.08      |
| 0.1                     | 94.87     | 1.45      |
| 1                       | 93.72     | 1.29      |
| 10                      | 59.71     | 3.40      |
| 100                     | 27.94     | 0.01      |

### Cytotoxicity assay of 4q

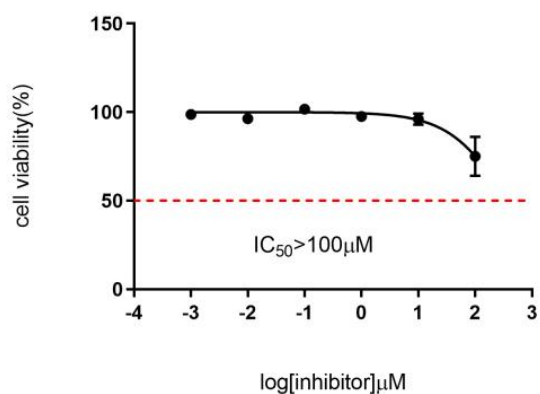

| Conc.( $\mu\text{M}$ ) | Viability |          |
|------------------------|-----------|----------|
|                        | AVE.      | $\pm$ SD |
| 0                      | 100.00    | 2.66     |
| 0.01                   | 96.27     | 2.39     |
| 0.1                    | 101.67    | 2.52     |
| 1                      | 97.57     | 2.28     |
| 10                     | 96.00     | 3.21     |
| 100                    | 75.00     | 11.00    |

### Cytotoxicity assay for the compound 4q (MCF-10A)

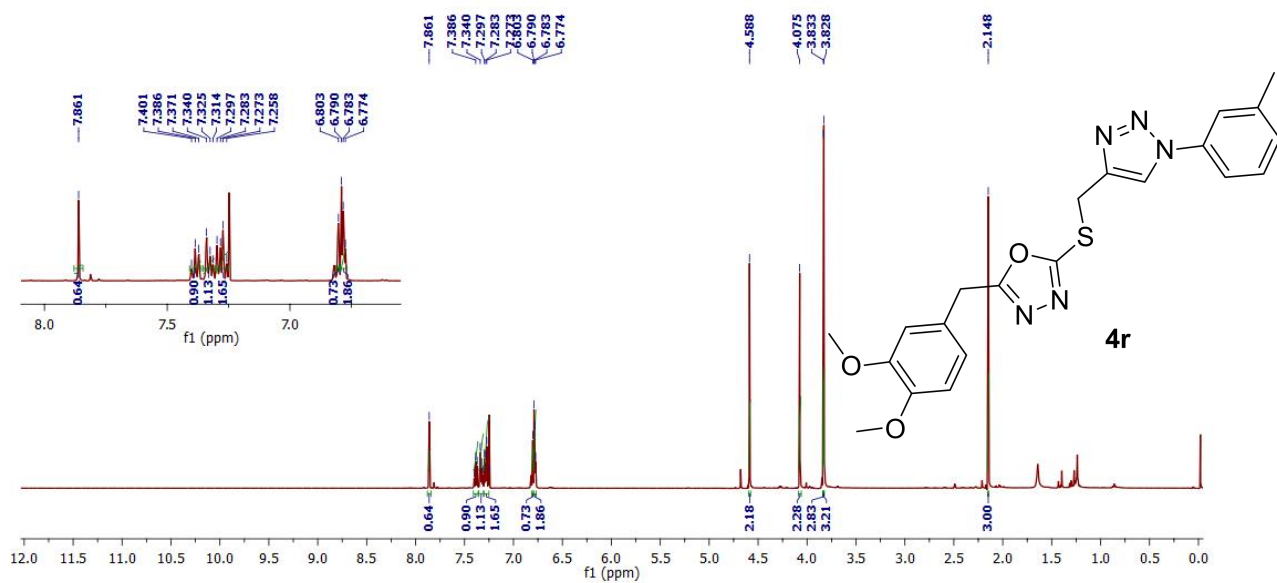

<sup>1</sup>H NMR of 4r

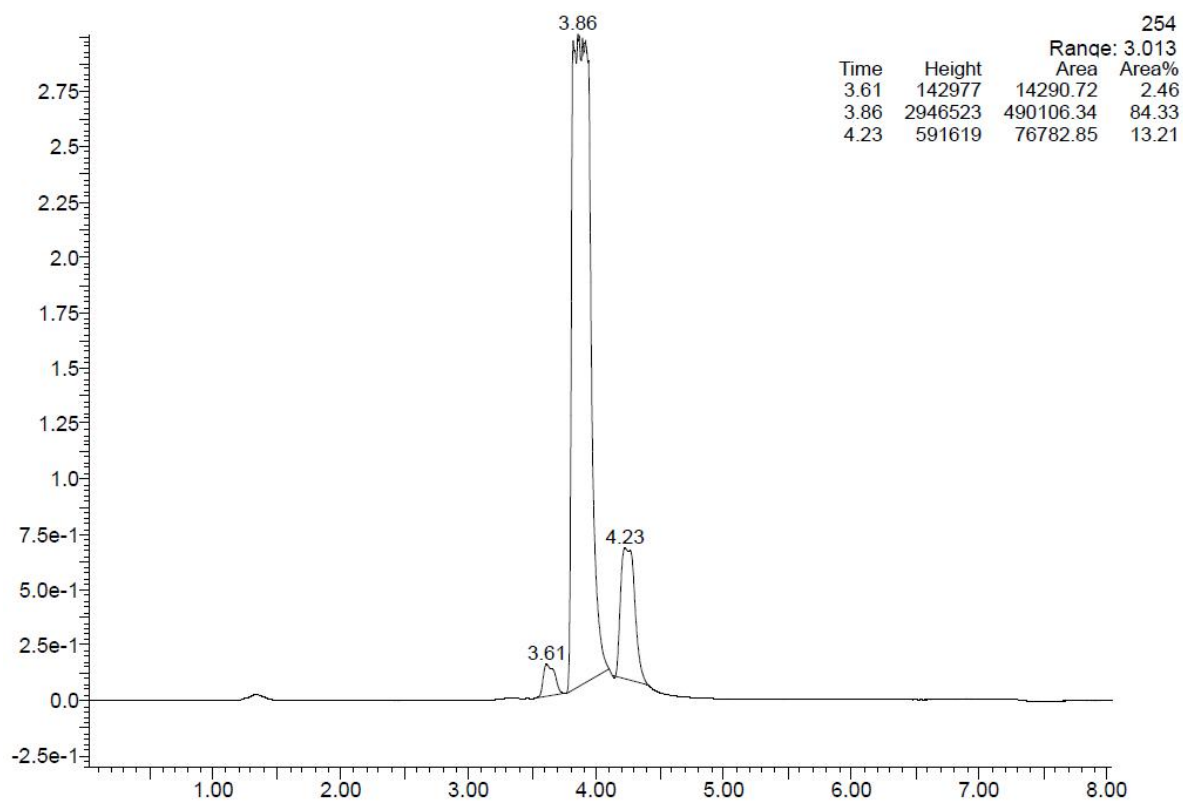

Liquid chromatogram of 4r

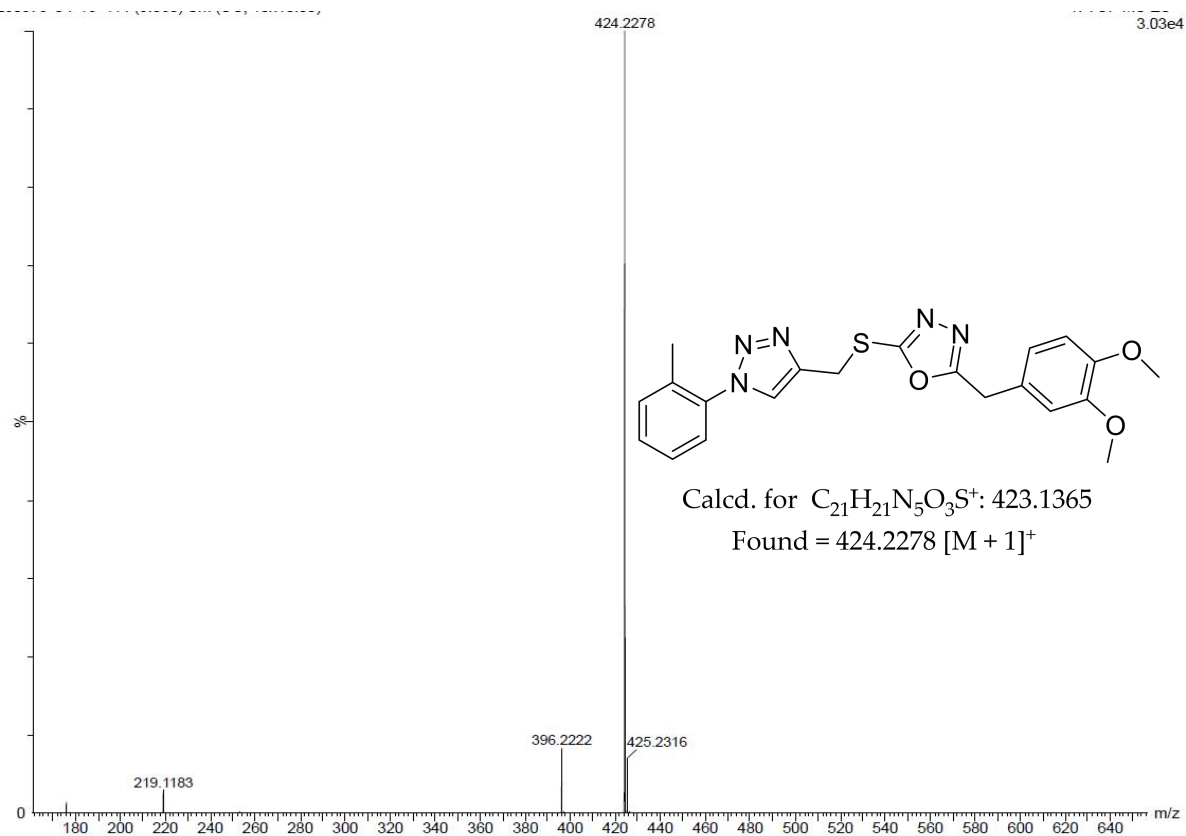

Mass spectra of **4r**

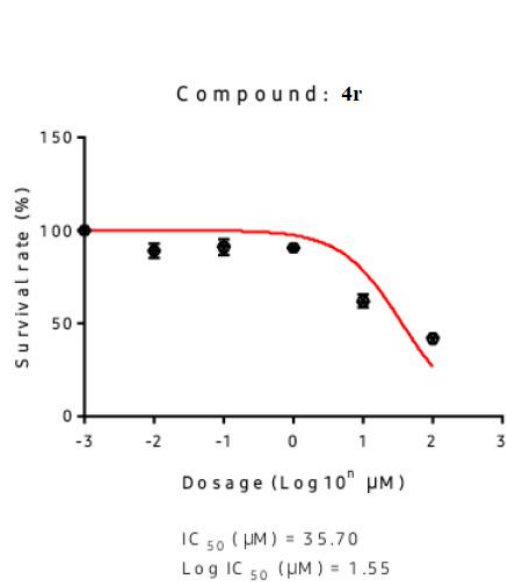

- Cell line: MCF-7 (2000 cells/per well<sup>96</sup>-well plate)
- Treated time: 72hrs
- Assay: alamarBlue (4hrs incubated)
- Data: **4r**

| Conc. ( $\mu\text{M}$ ) | Viability |           |
|-------------------------|-----------|-----------|
|                         | AVE.      | $\pm$ SD. |
| 0                       | 100.00    | 0.89      |
| 0.01                    | 89.10     | 4.09      |
| 0.1                     | 90.93     | 4.21      |
| 1                       | 90.67     | 1.19      |
| 10                      | 61.89     | 3.54      |
| 100                     | 41.66     | 1.56      |

Cytotoxicity assay of **4r**
